# Supplementary material for: The PIN-FORMED Auxin Efflux Carriers in Plants
Source: Int J Mol Sci. 2018 Sep 14;19(9):2759. doi: 10.3390/ijms19092759 (PMC6164769; doi:10.3390/ijms19092759)
Supplement: Supplementary file 1 [file ijms-19-02759-s001.xlsx]

## Sheet: Sheet1
Table S1 Protein interaction network of PIN proteins in Arabidopsis.
Protein 1	Symbol of protein 1	Description of protein 1	Fuctional catogory of protein 1	Cellular location of protein 1	Protein 2	Symbol of protein 2	Description of protein 2	Fuctional catogory of protein 2	Cellular location of protein 2	Reference	Publication ID	Detection method
AT1G73590	PIN1	Encodes an auxin efflux carrier involved in shoot and root development. It is involved in the maintenance of embryonic auxin gradients. Loss of function severely affects organ initiation, pin1 mutants are characterised by an inflorescence meristem that does not initiate any flowers, resulting in the formation of a naked inflorescence stem. PIN1 is involved in the determination of leaf shape by ac…	hormone metabolism.auxin.signal transduction	plasma membrane	AT5G55910	D6PK	D6PK is a protein kinase involved that plays a role in polar auxin transport. Most likely acts redundantly with the related proteins: D6PKL1,D6PKL2,and D6PKL3. PIN1 is a target of D6PK phosphorylation. D6PK is associated with sterol enriched membrane rafts and may be involved in regulation of the switch from basal to planar polarity during root hair initiation.	protein.postranslational modification	plastid	Zourelidou M (2009)	19168677	enzymatic study
AT5G57090	PIN2	Encodes an auxin efflux carrier that is similar to bacterial membrane transporters. Root-specific role in the transport of auxin. Acts downstream of CTR1 and ethylene biosynthesis, in the same pathway as EIN2 and AUX1, and independent from EIN3 and EIN5/AIN1 pathway. In the root, the protein localizes apically in epidermal and lateral root cap cells and predominantly basally in cortical cells. Fu…	hormone metabolism.auxin.signal transduction	plasma membrane	AT5G55910	D6PK	D6PK is a protein kinase involved that plays a role in polar auxin transport. Most likely acts redundantly with the related proteins: D6PKL1,D6PKL2,and D6PKL3. PIN1 is a target of D6PK phosphorylation. D6PK is associated with sterol enriched membrane rafts and may be involved in regulation of the switch from basal to planar polarity during root hair initiation.	protein.postranslational modification	plastid	Zourelidou M (2009)	19168677	enzymatic study
AT1G70940	PIN3	A regulator of auxin efflux and involved in differential growth. PIN3 is expressed in gravity-sensing tissues, with PIN3 protein accumulating predominantly at the lateral cell surface. PIN3 localizes to the plasma membrane and to vesicles. In roots, PIN3 is expressed without pronounced polarity in tiers two and three of the columella cells, at the basal side of vascular cells, and to the lateral …	hormone metabolism.auxin.signal transduction	plasma membrane	AT5G55910	D6PK	D6PK is a protein kinase involved that plays a role in polar auxin transport. Most likely acts redundantly with the related proteins: D6PKL1,D6PKL2,and D6PKL3. PIN1 is a target of D6PK phosphorylation. D6PK is associated with sterol enriched membrane rafts and may be involved in regulation of the switch from basal to planar polarity during root hair initiation.	protein.postranslational modification	plastid	Zourelidou M (2009)	19168677	enzymatic study
AT2G01420	PIN4	Encodes a putative auxin efflux carrier that is localized in developing and mature root meristems. It is involved in the maintenance of embryonic auxin gradients. A role for AtPIN4 in generating a sink for auxin below the quiescent center of the root meristem that is essential for auxin distribution and patterning is proposed. In the root, PIN4 is detected around the quiescent center and cells su…	hormone metabolism.auxin.signal transduction	plasma membrane	AT5G55910	D6PK	D6PK is a protein kinase involved that plays a role in polar auxin transport. Most likely acts redundantly with the related proteins: D6PKL1,D6PKL2,and D6PKL3. PIN1 is a target of D6PK phosphorylation. D6PK is associated with sterol enriched membrane rafts and may be involved in regulation of the switch from basal to planar polarity during root hair initiation.	protein.postranslational modification	plastid	Zourelidou M (2009)	19168677	enzymatic study
AT1G23080	PIN7	Encodes a novel component of auxin efflux that is located apically in the basal cell and is involved during embryogenesis in setting up the apical-basal axis in the embryo. It is also involved in pattern specification during root development. In roots, it is expressed at lateral and basal membranes of provascular cells in the meristem and elongation zone, whereas in the columella cells it coincid…	hormone metabolism.auxin.signal transduction	plasma membrane	AT5G55910	D6PK	D6PK is a protein kinase involved that plays a role in polar auxin transport. Most likely acts redundantly with the related proteins: D6PKL1,D6PKL2,and D6PKL3. PIN1 is a target of D6PK phosphorylation. D6PK is associated with sterol enriched membrane rafts and may be involved in regulation of the switch from basal to planar polarity during root hair initiation.	protein.postranslational modification	plastid	Zourelidou M (2009)	19168677	enzymatic study
AT1G23080	PIN7	Encodes a novel component of auxin efflux that is located apically in the basal cell and is involved during embryogenesis in setting up the apical-basal axis in the embryo. It is also involved in pattern specification during root development. In roots, it is expressed at lateral and basal membranes of provascular cells in the meristem and elongation zone, whereas in the columella cells it coincid…	hormone metabolism.auxin.signal transduction	plasma membrane	AT1G35670	AtCDPK2	Encodes a Ca(2+)-dependent, calmodulin-independent protein kinase that is rapidly induced by drought and high-salt stress but not by low-temperature stress or heat stress. Positive regulator of ABA signaling. Phosphorylates ABA responsive transcription factors ABF1 and ABF4.	signalling.calcium	cytosol	Uno Y (2009)	19130088	two hybrid
AT1G23080	PIN7	Encodes a novel component of auxin efflux that is located apically in the basal cell and is involved during embryogenesis in setting up the apical-basal axis in the embryo. It is also involved in pattern specification during root development. In roots, it is expressed at lateral and basal membranes of provascular cells in the meristem and elongation zone, whereas in the columella cells it coincid…	hormone metabolism.auxin.signal transduction	plasma membrane	AT4G09570	AtCPK4	Encodes a member of Calcium Dependent Protein Kinase (CDPK) gene family.Positive regulator of ABA signaling. Phosphorylates ABA responsive transcription factors ABF1 and ABF4.	signalling.calcium	cytosol	Uno Y (2009)	19130088	two hybrid
AT1G23080	PIN7	Encodes a novel component of auxin efflux that is located apically in the basal cell and is involved during embryogenesis in setting up the apical-basal axis in the embryo. It is also involved in pattern specification during root development. In roots, it is expressed at lateral and basal membranes of provascular cells in the meristem and elongation zone, whereas in the columella cells it coincid…	hormone metabolism.auxin.signal transduction	plasma membrane	AT5G38480	GRF3	general regulatory factor, a 14-3-3 gene	signalling.14-3-3 proteins	cytosol	Shin R (2011)	21094157	affinity chromatography technology
AT5G57090	PIN2	Encodes an auxin efflux carrier that is similar to bacterial membrane transporters. Root-specific role in the transport of auxin. Acts downstream of CTR1 and ethylene biosynthesis, in the same pathway as EIN2 and AUX1, and independent from EIN3 and EIN5/AIN1 pathway. In the root, the protein localizes apically in epidermal and lateral root cap cells and predominantly basally in cortical cells. Fu…	hormone metabolism.auxin.signal transduction	plasma membrane	AT4G23130	CRK5	Encodes a receptor-like protein kinase. Naming convention from Chen et al 2003 (PMID 14756307)	signalling.receptor kinases.DUF 26	plasma membrane	Rigo G (2013)	23673979	enzymatic study
AT1G73590	PIN1	Encodes an auxin efflux carrier involved in shoot and root development. It is involved in the maintenance of embryonic auxin gradients. Loss of function severely affects organ initiation, pin1 mutants are characterised by an inflorescence meristem that does not initiate any flowers, resulting in the formation of a naked inflorescence stem. PIN1 is involved in the determination of leaf shape by ac…	hormone metabolism.auxin.signal transduction	plasma membrane	AT4G02030	UNH	Vps51/Vps67 family (components of vesicular transport) protein;(source:Araport11)	not assigned.unknown	golgi	Pahari S (2014)	24757006	genetic interference
AT1G73590	PIN1	Encodes an auxin efflux carrier involved in shoot and root development. It is involved in the maintenance of embryonic auxin gradients. Loss of function severely affects organ initiation, pin1 mutants are characterised by an inflorescence meristem that does not initiate any flowers, resulting in the formation of a naked inflorescence stem. PIN1 is involved in the determination of leaf shape by ac…	hormone metabolism.auxin.signal transduction	plasma membrane	AT5G42080	DRP1	Encodes a dynamin-like protein related to phragmoplastin. Mutations in this gene, in combination with mutation in ADL1E, result in defects in embryogenesis, cell plate formation and trichome branching. Also controls vascular patterning in combination with VAN3 and GNOM. DRP2B and DRP1A participate together in clathrin-coated vesicle formation during endocytosis.	signalling.G-proteins	plasma membrane	Mravec J (2011)	21658946	affinity chromatography technology
AT5G57090	PIN2	Encodes an auxin efflux carrier that is similar to bacterial membrane transporters. Root-specific role in the transport of auxin. Acts downstream of CTR1 and ethylene biosynthesis, in the same pathway as EIN2 and AUX1, and independent from EIN3 and EIN5/AIN1 pathway. In the root, the protein localizes apically in epidermal and lateral root cap cells and predominantly basally in cortical cells. Fu…	hormone metabolism.auxin.signal transduction	plasma membrane	AT5G22770	AP2A1	alpha-adaptin;(source:Araport11)	cell.vesicle transport	plasma membrane	Kim SY (2013)	23975898	affinity chromatography technology
AT1G73590	PIN1	Encodes an auxin efflux carrier involved in shoot and root development. It is involved in the maintenance of embryonic auxin gradients. Loss of function severely affects organ initiation, pin1 mutants are characterised by an inflorescence meristem that does not initiate any flowers, resulting in the formation of a naked inflorescence stem. PIN1 is involved in the determination of leaf shape by ac…	hormone metabolism.auxin.signal transduction	plasma membrane	AT3G13410	At3g13410	2-C-methyl-D-erythritol 4-phosphate cytidylyltransferase;(source:Araport11)	not assigned.unknown	endoplasmic reticulum	Jones AM (2014)	24833385	protein complementation assay
AT1G73590	PIN1	Encodes an auxin efflux carrier involved in shoot and root development. It is involved in the maintenance of embryonic auxin gradients. Loss of function severely affects organ initiation, pin1 mutants are characterised by an inflorescence meristem that does not initiate any flowers, resulting in the formation of a naked inflorescence stem. PIN1 is involved in the determination of leaf shape by ac…	hormone metabolism.auxin.signal transduction	plasma membrane	AT4G22130	SRF8	STRUBBELIG-receptor family 8;(source:Araport11)	protein.postranslational modification.kinase.receptor like cytoplasmatic kinase VII	plasma membrane	Jones AM (2014)	24833385	protein complementation assay
AT5G57090	PIN2	Encodes an auxin efflux carrier that is similar to bacterial membrane transporters. Root-specific role in the transport of auxin. Acts downstream of CTR1 and ethylene biosynthesis, in the same pathway as EIN2 and AUX1, and independent from EIN3 and EIN5/AIN1 pathway. In the root, the protein localizes apically in epidermal and lateral root cap cells and predominantly basally in cortical cells. Fu…	hormone metabolism.auxin.signal transduction	plasma membrane	AT4G16444	At4g16444	GET1 membrane receptor homolog . ER localized protein that Interacts with GET3a. Disruption of both genes results in a decreased membrane localization of the SNARE proteinSYP123 and defects in root hair elongation.	not assigned.unknown	plasma membrane	Jones AM (2014)	24833385	protein complementation assay
AT5G57090	PIN2	Encodes an auxin efflux carrier that is similar to bacterial membrane transporters. Root-specific role in the transport of auxin. Acts downstream of CTR1 and ethylene biosynthesis, in the same pathway as EIN2 and AUX1, and independent from EIN3 and EIN5/AIN1 pathway. In the root, the protein localizes apically in epidermal and lateral root cap cells and predominantly basally in cortical cells. Fu…	hormone metabolism.auxin.signal transduction	plasma membrane	AT3G21690	At3g21690	MATE efflux family protein;(source:Araport11)	transport.misc	vacuole	Jones AM (2014)	24833385	protein complementation assay
AT2G01420	PIN4	Encodes a putative auxin efflux carrier that is localized in developing and mature root meristems. It is involved in the maintenance of embryonic auxin gradients. A role for AtPIN4 in generating a sink for auxin below the quiescent center of the root meristem that is essential for auxin distribution and patterning is proposed. In the root, PIN4 is detected around the quiescent center and cells su…	hormone metabolism.auxin.signal transduction	plasma membrane	AT3G06360	AGP27	Encodes an arabinogalactan-protein (AGP27).	cell wall.cell wall proteins.AGPs	extracellular	Jones AM (2014)	24833385	protein complementation assay
AT2G01420	PIN4	Encodes a putative auxin efflux carrier that is localized in developing and mature root meristems. It is involved in the maintenance of embryonic auxin gradients. A role for AtPIN4 in generating a sink for auxin below the quiescent center of the root meristem that is essential for auxin distribution and patterning is proposed. In the root, PIN4 is detected around the quiescent center and cells su…	hormone metabolism.auxin.signal transduction	plasma membrane	AT1G56710	At1g56710	Pectin lyase-like superfamily protein;(source:Araport11)	cell wall.degradation.pectate lyases and polygalacturonases	extracellular	Jones AM (2014)	24833385	protein complementation assay
AT2G01420	PIN4	Encodes a putative auxin efflux carrier that is localized in developing and mature root meristems. It is involved in the maintenance of embryonic auxin gradients. A role for AtPIN4 in generating a sink for auxin below the quiescent center of the root meristem that is essential for auxin distribution and patterning is proposed. In the root, PIN4 is detected around the quiescent center and cells su…	hormone metabolism.auxin.signal transduction	plasma membrane	AT4G12250	GAE5	UDP-D-glucuronate 4-epimerase	cell wall.precursor synthesis.GAE	golgi	Jones AM (2014)	24833385	protein complementation assay
AT2G01420	PIN4	Encodes a putative auxin efflux carrier that is localized in developing and mature root meristems. It is involved in the maintenance of embryonic auxin gradients. A role for AtPIN4 in generating a sink for auxin below the quiescent center of the root meristem that is essential for auxin distribution and patterning is proposed. In the root, PIN4 is detected around the quiescent center and cells su…	hormone metabolism.auxin.signal transduction	plasma membrane	AT1G14020	At1g14020	O-fucosyltransferase family protein;(source:Araport11)	hormone metabolism.auxin.induced-regulated-responsive-activated	golgi	Jones AM (2014)	24833385	protein complementation assay
AT2G01420	PIN4	Encodes a putative auxin efflux carrier that is localized in developing and mature root meristems. It is involved in the maintenance of embryonic auxin gradients. A role for AtPIN4 in generating a sink for auxin below the quiescent center of the root meristem that is essential for auxin distribution and patterning is proposed. In the root, PIN4 is detected around the quiescent center and cells su…	hormone metabolism.auxin.signal transduction	plasma membrane	AT3G03520	NPC3	Lysophosphatidic acid phosphatase highly expressed during phosphate starvation and abiotic stresses. Role in lipid synthesis.	lipid metabolism.lipid degradation.lysophospholipases.phosphoinositide phospholipase C	plasma membrane	Jones AM (2014)	24833385	protein complementation assay
AT2G01420	PIN4	Encodes a putative auxin efflux carrier that is localized in developing and mature root meristems. It is involved in the maintenance of embryonic auxin gradients. A role for AtPIN4 in generating a sink for auxin below the quiescent center of the root meristem that is essential for auxin distribution and patterning is proposed. In the root, PIN4 is detected around the quiescent center and cells su…	hormone metabolism.auxin.signal transduction	plasma membrane	AT1G27440	AtGUT1	IRX10 was identified as MUCI69 in a reverse genetic screen for MUCILAGE-RELATED genes. Mutations in this gene did not disrupt mucilage properties, likely due to the presence of the functionally redundant IRX10-L.	misc.UDP glucosyl and glucoronyl transferases	endoplasmic reticulum,extracellular	Jones AM (2014)	24833385	protein complementation assay
AT2G01420	PIN4	Encodes a putative auxin efflux carrier that is localized in developing and mature root meristems. It is involved in the maintenance of embryonic auxin gradients. A role for AtPIN4 in generating a sink for auxin below the quiescent center of the root meristem that is essential for auxin distribution and patterning is proposed. In the root, PIN4 is detected around the quiescent center and cells su…	hormone metabolism.auxin.signal transduction	plasma membrane	AT1G14670	At1g14670	Endomembrane protein 70 protein family;(source:Araport11)	not assigned.no ontology	golgi	Jones AM (2014)	24833385	protein complementation assay
AT2G01420	PIN4	Encodes a putative auxin efflux carrier that is localized in developing and mature root meristems. It is involved in the maintenance of embryonic auxin gradients. A role for AtPIN4 in generating a sink for auxin below the quiescent center of the root meristem that is essential for auxin distribution and patterning is proposed. In the root, PIN4 is detected around the quiescent center and cells su…	hormone metabolism.auxin.signal transduction	plasma membrane	AT3G12180	At3g12180	Cornichon family protein;(source:Araport11)	not assigned.no ontology	extracellular	Jones AM (2014)	24833385	protein complementation assay
AT2G01420	PIN4	Encodes a putative auxin efflux carrier that is localized in developing and mature root meristems. It is involved in the maintenance of embryonic auxin gradients. A role for AtPIN4 in generating a sink for auxin below the quiescent center of the root meristem that is essential for auxin distribution and patterning is proposed. In the root, PIN4 is detected around the quiescent center and cells su…	hormone metabolism.auxin.signal transduction	plasma membrane	AT3G28220	At3g28220	TRAF-like family protein;(source:Araport11)	not assigned.no ontology	plastid	Jones AM (2014)	24833385	protein complementation assay
AT2G01420	PIN4	Encodes a putative auxin efflux carrier that is localized in developing and mature root meristems. It is involved in the maintenance of embryonic auxin gradients. A role for AtPIN4 in generating a sink for auxin below the quiescent center of the root meristem that is essential for auxin distribution and patterning is proposed. In the root, PIN4 is detected around the quiescent center and cells su…	hormone metabolism.auxin.signal transduction	plasma membrane	AT4G01410	At4g01410	Late embryogenesis abundant (LEA) hydroxyproline-rich glycoprotein family;(source:Araport11)	not assigned.no ontology	plasma membrane	Jones AM (2014)	24833385	protein complementation assay
AT2G01420	PIN4	Encodes a putative auxin efflux carrier that is localized in developing and mature root meristems. It is involved in the maintenance of embryonic auxin gradients. A role for AtPIN4 in generating a sink for auxin below the quiescent center of the root meristem that is essential for auxin distribution and patterning is proposed. In the root, PIN4 is detected around the quiescent center and cells su…	hormone metabolism.auxin.signal transduction	plasma membrane	AT3G46890	At3g46890	maternal effect embryo arrest protein;(source:Araport11)	not assigned.unknown	plasma membrane	Jones AM (2014)	24833385	protein complementation assay
AT2G01420	PIN4	Encodes a putative auxin efflux carrier that is localized in developing and mature root meristems. It is involved in the maintenance of embryonic auxin gradients. A role for AtPIN4 in generating a sink for auxin below the quiescent center of the root meristem that is essential for auxin distribution and patterning is proposed. In the root, PIN4 is detected around the quiescent center and cells su…	hormone metabolism.auxin.signal transduction	plasma membrane	AT2G01340	At17.1	Encodes a protein whose expression is responsive to nematode infection.	not assigned.unknown	cytosol	Jones AM (2014)	24833385	protein complementation assay
AT2G01420	PIN4	Encodes a putative auxin efflux carrier that is localized in developing and mature root meristems. It is involved in the maintenance of embryonic auxin gradients. A role for AtPIN4 in generating a sink for auxin below the quiescent center of the root meristem that is essential for auxin distribution and patterning is proposed. In the root, PIN4 is detected around the quiescent center and cells su…	hormone metabolism.auxin.signal transduction	plasma membrane	AT1G07860	At1g07860	Serine/Threonine-kinase RLCKVII protein;(source:Araport11)	not assigned.unknown	plasma membrane	Jones AM (2014)	24833385	protein complementation assay
AT2G01420	PIN4	Encodes a putative auxin efflux carrier that is localized in developing and mature root meristems. It is involved in the maintenance of embryonic auxin gradients. A role for AtPIN4 in generating a sink for auxin below the quiescent center of the root meristem that is essential for auxin distribution and patterning is proposed. In the root, PIN4 is detected around the quiescent center and cells su…	hormone metabolism.auxin.signal transduction	plasma membrane	AT1G14990	At1g14990	transmembrane protein;(source:Araport11)	not assigned.unknown	mitochondrion	Jones AM (2014)	24833385	protein complementation assay
AT2G01420	PIN4	Encodes a putative auxin efflux carrier that is localized in developing and mature root meristems. It is involved in the maintenance of embryonic auxin gradients. A role for AtPIN4 in generating a sink for auxin below the quiescent center of the root meristem that is essential for auxin distribution and patterning is proposed. In the root, PIN4 is detected around the quiescent center and cells su…	hormone metabolism.auxin.signal transduction	plasma membrane	AT1G16170	At1g16170	ephrin-A3 protein;(source:Araport11)	not assigned.unknown	endoplasmic reticulum	Jones AM (2014)	24833385	protein complementation assay
AT2G01420	PIN4	Encodes a putative auxin efflux carrier that is localized in developing and mature root meristems. It is involved in the maintenance of embryonic auxin gradients. A role for AtPIN4 in generating a sink for auxin below the quiescent center of the root meristem that is essential for auxin distribution and patterning is proposed. In the root, PIN4 is detected around the quiescent center and cells su…	hormone metabolism.auxin.signal transduction	plasma membrane	AT1G17080	At1g17080	Ribosomal protein L18ae family;(source:Araport11)	not assigned.unknown	plasma membrane	Jones AM (2014)	24833385	protein complementation assay
AT2G01420	PIN4	Encodes a putative auxin efflux carrier that is localized in developing and mature root meristems. It is involved in the maintenance of embryonic auxin gradients. A role for AtPIN4 in generating a sink for auxin below the quiescent center of the root meristem that is essential for auxin distribution and patterning is proposed. In the root, PIN4 is detected around the quiescent center and cells su…	hormone metabolism.auxin.signal transduction	plasma membrane	AT1G29060	At1g29060	Encodes a golgi localized QcSNARE involved in response to salt and osmotic stress. Overexpression confers increased resistance to NaCl, mannitol and LiCl. SFT12 may act by mediating vacuolar sequestration of NaCl and other ions.	not assigned.unknown	golgi	Jones AM (2014)	24833385	protein complementation assay
AT2G01420	PIN4	Encodes a putative auxin efflux carrier that is localized in developing and mature root meristems. It is involved in the maintenance of embryonic auxin gradients. A role for AtPIN4 in generating a sink for auxin below the quiescent center of the root meristem that is essential for auxin distribution and patterning is proposed. In the root, PIN4 is detected around the quiescent center and cells su…	hormone metabolism.auxin.signal transduction	plasma membrane	AT1G34640	At1g34640	peptidase;(source:Araport11)	not assigned.unknown	extracellular	Jones AM (2014)	24833385	protein complementation assay
AT2G01420	PIN4	Encodes a putative auxin efflux carrier that is localized in developing and mature root meristems. It is involved in the maintenance of embryonic auxin gradients. A role for AtPIN4 in generating a sink for auxin below the quiescent center of the root meristem that is essential for auxin distribution and patterning is proposed. In the root, PIN4 is detected around the quiescent center and cells su…	hormone metabolism.auxin.signal transduction	plasma membrane	AT1G47640	At1g47640	seven transmembrane domain protein;(source:Araport11)	not assigned.unknown	plasma membrane	Jones AM (2014)	24833385	protein complementation assay
AT2G01420	PIN4	Encodes a putative auxin efflux carrier that is localized in developing and mature root meristems. It is involved in the maintenance of embryonic auxin gradients. A role for AtPIN4 in generating a sink for auxin below the quiescent center of the root meristem that is essential for auxin distribution and patterning is proposed. In the root, PIN4 is detected around the quiescent center and cells su…	hormone metabolism.auxin.signal transduction	plasma membrane	AT1G77350	At1g77350	keratinocyte-associated-like protein;(source:Araport11)	not assigned.unknown	endoplasmic reticulum	Jones AM (2014)	24833385	protein complementation assay
AT2G01420	PIN4	Encodes a putative auxin efflux carrier that is localized in developing and mature root meristems. It is involved in the maintenance of embryonic auxin gradients. A role for AtPIN4 in generating a sink for auxin below the quiescent center of the root meristem that is essential for auxin distribution and patterning is proposed. In the root, PIN4 is detected around the quiescent center and cells su…	hormone metabolism.auxin.signal transduction	plasma membrane	AT2G27290	At2g27290	FAM210B-like protein, putative (DUF1279);(source:Araport11)	not assigned.unknown	plastid	Jones AM (2014)	24833385	protein complementation assay
AT2G01420	PIN4	Encodes a putative auxin efflux carrier that is localized in developing and mature root meristems. It is involved in the maintenance of embryonic auxin gradients. A role for AtPIN4 in generating a sink for auxin below the quiescent center of the root meristem that is essential for auxin distribution and patterning is proposed. In the root, PIN4 is detected around the quiescent center and cells su…	hormone metabolism.auxin.signal transduction	plasma membrane	AT2G32380	At2g32380	Transmembrane protein 97, Putative;(source:Araport11)	not assigned.unknown	extracellular	Jones AM (2014)	24833385	protein complementation assay
AT2G01420	PIN4	Encodes a putative auxin efflux carrier that is localized in developing and mature root meristems. It is involved in the maintenance of embryonic auxin gradients. A role for AtPIN4 in generating a sink for auxin below the quiescent center of the root meristem that is essential for auxin distribution and patterning is proposed. In the root, PIN4 is detected around the quiescent center and cells su…	hormone metabolism.auxin.signal transduction	plasma membrane	AT3G29034	At3g29034	transmembrane protein;(source:Araport11)	not assigned.unknown	cytosol	Jones AM (2014)	24833385	protein complementation assay
AT2G01420	PIN4	Encodes a putative auxin efflux carrier that is localized in developing and mature root meristems. It is involved in the maintenance of embryonic auxin gradients. A role for AtPIN4 in generating a sink for auxin below the quiescent center of the root meristem that is essential for auxin distribution and patterning is proposed. In the root, PIN4 is detected around the quiescent center and cells su…	hormone metabolism.auxin.signal transduction	plasma membrane	AT3G52070	At3g52070	RNA/RNP complex-1-interacting phosphatase;(source:Araport11)	not assigned.unknown	plastid	Jones AM (2014)	24833385	protein complementation assay
AT2G01420	PIN4	Encodes a putative auxin efflux carrier that is localized in developing and mature root meristems. It is involved in the maintenance of embryonic auxin gradients. A role for AtPIN4 in generating a sink for auxin below the quiescent center of the root meristem that is essential for auxin distribution and patterning is proposed. In the root, PIN4 is detected around the quiescent center and cells su…	hormone metabolism.auxin.signal transduction	plasma membrane	AT5G03545	AT4	Expressed in response to phosphate starvation, this response is enhanced by the presence of IAA. Additionally, its expression is responsive to both phosphate (Pi) and phosphite (Phi) in shoots. The mRNA is cell-to-cell mobile.	not assigned.unknown	plasma membrane	Jones AM (2014)	24833385	protein complementation assay
AT2G01420	PIN4	Encodes a putative auxin efflux carrier that is localized in developing and mature root meristems. It is involved in the maintenance of embryonic auxin gradients. A role for AtPIN4 in generating a sink for auxin below the quiescent center of the root meristem that is essential for auxin distribution and patterning is proposed. In the root, PIN4 is detected around the quiescent center and cells su…	hormone metabolism.auxin.signal transduction	plasma membrane	AT4G40045	At4g40045	transmembrane protein;(source:Araport11)	not assigned.unknown	mitochondrion	Jones AM (2014)	24833385	protein complementation assay
AT2G01420	PIN4	Encodes a putative auxin efflux carrier that is localized in developing and mature root meristems. It is involved in the maintenance of embryonic auxin gradients. A role for AtPIN4 in generating a sink for auxin below the quiescent center of the root meristem that is essential for auxin distribution and patterning is proposed. In the root, PIN4 is detected around the quiescent center and cells su…	hormone metabolism.auxin.signal transduction	plasma membrane	AT5G03345	At5g03345	membrane magnesium transporter-like protein;(source:Araport11)	not assigned.unknown	endoplasmic reticulum	Jones AM (2014)	24833385	protein complementation assay
AT2G01420	PIN4	Encodes a putative auxin efflux carrier that is localized in developing and mature root meristems. It is involved in the maintenance of embryonic auxin gradients. A role for AtPIN4 in generating a sink for auxin below the quiescent center of the root meristem that is essential for auxin distribution and patterning is proposed. In the root, PIN4 is detected around the quiescent center and cells su…	hormone metabolism.auxin.signal transduction	plasma membrane	AT5G49540	At5g49540	Rab5-interacting family protein;(source:Araport11)	not assigned.unknown	plasma membrane	Jones AM (2014)	24833385	protein complementation assay
AT2G01420	PIN4	Encodes a putative auxin efflux carrier that is localized in developing and mature root meristems. It is involved in the maintenance of embryonic auxin gradients. A role for AtPIN4 in generating a sink for auxin below the quiescent center of the root meristem that is essential for auxin distribution and patterning is proposed. In the root, PIN4 is detected around the quiescent center and cells su…	hormone metabolism.auxin.signal transduction	plasma membrane	AT5G11890	EMB3135	harpin-induced protein;(source:Araport11)	not assigned.unknown	plasma membrane	Jones AM (2014)	24833385	protein complementation assay
AT2G01420	PIN4	Encodes a putative auxin efflux carrier that is localized in developing and mature root meristems. It is involved in the maintenance of embryonic auxin gradients. A role for AtPIN4 in generating a sink for auxin below the quiescent center of the root meristem that is essential for auxin distribution and patterning is proposed. In the root, PIN4 is detected around the quiescent center and cells su…	hormone metabolism.auxin.signal transduction	plasma membrane	AT4G30850	HHP2	heptahelical transmembrane protein homologous to human adiponectin receptors and progestin receptors	not assigned.unknown	golgi	Jones AM (2014)	24833385	protein complementation assay
AT2G01420	PIN4	Encodes a putative auxin efflux carrier that is localized in developing and mature root meristems. It is involved in the maintenance of embryonic auxin gradients. A role for AtPIN4 in generating a sink for auxin below the quiescent center of the root meristem that is essential for auxin distribution and patterning is proposed. In the root, PIN4 is detected around the quiescent center and cells su…	hormone metabolism.auxin.signal transduction	plasma membrane	AT4G37680	HHP4	heptahelical transmembrane protein HHP4	not assigned.unknown	plasma membrane,golgi	Jones AM (2014)	24833385	protein complementation assay
AT2G01420	PIN4	Encodes a putative auxin efflux carrier that is localized in developing and mature root meristems. It is involved in the maintenance of embryonic auxin gradients. A role for AtPIN4 in generating a sink for auxin below the quiescent center of the root meristem that is essential for auxin distribution and patterning is proposed. In the root, PIN4 is detected around the quiescent center and cells su…	hormone metabolism.auxin.signal transduction	plasma membrane	AT1G25510	At1g25510	Eukaryotic aspartyl protease family protein;(source:Araport11)	protein.degradation.aspartate protease	extracellular	Jones AM (2014)	24833385	protein complementation assay
AT2G01420	PIN4	Encodes a putative auxin efflux carrier that is localized in developing and mature root meristems. It is involved in the maintenance of embryonic auxin gradients. A role for AtPIN4 in generating a sink for auxin below the quiescent center of the root meristem that is essential for auxin distribution and patterning is proposed. In the root, PIN4 is detected around the quiescent center and cells su…	hormone metabolism.auxin.signal transduction	plasma membrane	AT1G63120	AtRBL2	AtRBL2 has been identified as a rhomboid protein involved in regulated intramembrane proteolysis (RIP). The enzyme has the proteolytic activity and substrate specificity comparable to the Drosophila Rho-1 protein.	protein.degradation.serine protease	plasma membrane	Jones AM (2014)	24833385	protein complementation assay
AT2G01420	PIN4	Encodes a putative auxin efflux carrier that is localized in developing and mature root meristems. It is involved in the maintenance of embryonic auxin gradients. A role for AtPIN4 in generating a sink for auxin below the quiescent center of the root meristem that is essential for auxin distribution and patterning is proposed. In the root, PIN4 is detected around the quiescent center and cells su…	hormone metabolism.auxin.signal transduction	plasma membrane	AT1G17280	UBC34	ubiquitin-conjugating enzyme 34;(source:Araport11)	protein.degradation.ubiquitin	cytosol,peroxisome	Jones AM (2014)	24833385	protein complementation assay
AT2G01420	PIN4	Encodes a putative auxin efflux carrier that is localized in developing and mature root meristems. It is involved in the maintenance of embryonic auxin gradients. A role for AtPIN4 in generating a sink for auxin below the quiescent center of the root meristem that is essential for auxin distribution and patterning is proposed. In the root, PIN4 is detected around the quiescent center and cells su…	hormone metabolism.auxin.signal transduction	plasma membrane	AT3G60220	ATL4	Encodes a putative RING-H2 zinc finger protein ATL4 (ATL4).	protein.degradation.ubiquitin.E3.RING	plasma membrane	Jones AM (2014)	24833385	protein complementation assay
AT2G01420	PIN4	Encodes a putative auxin efflux carrier that is localized in developing and mature root meristems. It is involved in the maintenance of embryonic auxin gradients. A role for AtPIN4 in generating a sink for auxin below the quiescent center of the root meristem that is essential for auxin distribution and patterning is proposed. In the root, PIN4 is detected around the quiescent center and cells su…	hormone metabolism.auxin.signal transduction	plasma membrane	AT4G29040	RPT2a	RPT2a encodes the 26S proteasome subunit. It is required for root meristem maintenance, and regulates gametogenesis. RPT2a is also shown to regulate gene silencing via DNA methylation.	protein.degradation.ubiquitin.proteasom	nucleus,cytosol	Jones AM (2014)	24833385	protein complementation assay
AT2G01420	PIN4	Encodes a putative auxin efflux carrier that is localized in developing and mature root meristems. It is involved in the maintenance of embryonic auxin gradients. A role for AtPIN4 in generating a sink for auxin below the quiescent center of the root meristem that is essential for auxin distribution and patterning is proposed. In the root, PIN4 is detected around the quiescent center and cells su…	hormone metabolism.auxin.signal transduction	plasma membrane	AT1G57870	AtSK42	shaggy-like kinase 42;(source:Araport11)	protein.postranslational modification.kinase	nucleus	Jones AM (2014)	24833385	protein complementation assay
AT2G01420	PIN4	Encodes a putative auxin efflux carrier that is localized in developing and mature root meristems. It is involved in the maintenance of embryonic auxin gradients. A role for AtPIN4 in generating a sink for auxin below the quiescent center of the root meristem that is essential for auxin distribution and patterning is proposed. In the root, PIN4 is detected around the quiescent center and cells su…	hormone metabolism.auxin.signal transduction	plasma membrane	AT5G55380	At5g55380	MBOAT (membrane bound O-acyl transferase) family protein;(source:Araport11)	secondary metabolism.wax	plasma membrane	Jones AM (2014)	24833385	protein complementation assay
AT2G01420	PIN4	Encodes a putative auxin efflux carrier that is localized in developing and mature root meristems. It is involved in the maintenance of embryonic auxin gradients. A role for AtPIN4 in generating a sink for auxin below the quiescent center of the root meristem that is essential for auxin distribution and patterning is proposed. In the root, PIN4 is detected around the quiescent center and cells su…	hormone metabolism.auxin.signal transduction	plasma membrane	AT5G07340	At5g07340	Calreticulin family protein;(source:Araport11)	signalling.calcium	endoplasmic reticulum	Jones AM (2014)	24833385	protein complementation assay
AT2G01420	PIN4	Encodes a putative auxin efflux carrier that is localized in developing and mature root meristems. It is involved in the maintenance of embryonic auxin gradients. A role for AtPIN4 in generating a sink for auxin below the quiescent center of the root meristem that is essential for auxin distribution and patterning is proposed. In the root, PIN4 is detected around the quiescent center and cells su…	hormone metabolism.auxin.signal transduction	plasma membrane	AT4G23650	CDPK6	Encodes calcium dependent protein kinase 3 (CPK3), a member of the Arabidopsis CDPK gene family. CDPKs contain an intrinsic Ca2+-activation domain with four EF hand Ca2+-binding sites. CDPKs protein kinases have been proposed to function in multiple plant signal transduction pathways downstream of [Ca2+]cyt elevations, thus transducing various physiological responses. CPK3 is expressed in both gu…	signalling.calcium	cytosol	Jones AM (2014)	24833385	protein complementation assay
AT2G01420	PIN4	Encodes a putative auxin efflux carrier that is localized in developing and mature root meristems. It is involved in the maintenance of embryonic auxin gradients. A role for AtPIN4 in generating a sink for auxin below the quiescent center of the root meristem that is essential for auxin distribution and patterning is proposed. In the root, PIN4 is detected around the quiescent center and cells su…	hormone metabolism.auxin.signal transduction	plasma membrane	AT2G26180	IQD6	Transient Expression of Pro35S:YFP-IQD5 in leaves of N. benthamiana alters microtubule organization.	signalling.calcium	nucleus	Jones AM (2014)	24833385	protein complementation assay
AT2G01420	PIN4	Encodes a putative auxin efflux carrier that is localized in developing and mature root meristems. It is involved in the maintenance of embryonic auxin gradients. A role for AtPIN4 in generating a sink for auxin below the quiescent center of the root meristem that is essential for auxin distribution and patterning is proposed. In the root, PIN4 is detected around the quiescent center and cells su…	hormone metabolism.auxin.signal transduction	plasma membrane	AT3G48040	ARAC8	Encodes a member of the Rop subfamily of Rho GTPases in Arabidopsis that contains a putative farnesylation motif. It is localized to the plasma membrane and involved in the negative regulation of ABA signalling.	signalling.G-proteins	plasma membrane	Jones AM (2014)	24833385	protein complementation assay
AT2G01420	PIN4	Encodes a putative auxin efflux carrier that is localized in developing and mature root meristems. It is involved in the maintenance of embryonic auxin gradients. A role for AtPIN4 in generating a sink for auxin below the quiescent center of the root meristem that is essential for auxin distribution and patterning is proposed. In the root, PIN4 is detected around the quiescent center and cells su…	hormone metabolism.auxin.signal transduction	plasma membrane	AT4G14690	ELIP2	Encodes an early light-induced protein. ELIPs are thought not to be directly involved in the synthesis and assembly of specific photosynthetic complexes, but rather affect the biogenesis of all chlorophyll-binding complexes. A study (PMID 17553115) has shown that the chlorophyll synthesis pathway was downregulated as a result of constitutive ELIP2 expression, leading to decreased chlorophyll avai…	signalling.light	plastid	Jones AM (2014)	24833385	protein complementation assay
AT2G01420	PIN4	Encodes a putative auxin efflux carrier that is localized in developing and mature root meristems. It is involved in the maintenance of embryonic auxin gradients. A role for AtPIN4 in generating a sink for auxin below the quiescent center of the root meristem that is essential for auxin distribution and patterning is proposed. In the root, PIN4 is detected around the quiescent center and cells su…	hormone metabolism.auxin.signal transduction	plasma membrane	AT5G59650	At5g59650	Leucine-rich repeat protein kinase family protein;(source:Araport11)	signalling.receptor kinases.leucine rich repeat I	plasma membrane	Jones AM (2014)	24833385	protein complementation assay
AT2G01420	PIN4	Encodes a putative auxin efflux carrier that is localized in developing and mature root meristems. It is involved in the maintenance of embryonic auxin gradients. A role for AtPIN4 in generating a sink for auxin below the quiescent center of the root meristem that is essential for auxin distribution and patterning is proposed. In the root, PIN4 is detected around the quiescent center and cells su…	hormone metabolism.auxin.signal transduction	plasma membrane	AT4G20790	At4g20790	Leucine-rich repeat protein kinase family protein;(source:Araport11)	signalling.receptor kinases.leucine rich repeat VI	plasma membrane	Jones AM (2014)	24833385	protein complementation assay
AT2G01420	PIN4	Encodes a putative auxin efflux carrier that is localized in developing and mature root meristems. It is involved in the maintenance of embryonic auxin gradients. A role for AtPIN4 in generating a sink for auxin below the quiescent center of the root meristem that is essential for auxin distribution and patterning is proposed. In the root, PIN4 is detected around the quiescent center and cells su…	hormone metabolism.auxin.signal transduction	plasma membrane	AT5G06320	NHL3	encodes a protein whose sequence is similar to tobacco hairpin-induced gene (HIN1) and Arabidopsis non-race specific disease resistance gene (NDR1). Expression of this gene is induced by cucumber mosaic virus, spermine and Pseudomonas syringae pv. tomato DC3000. The gene product is localized to the plasma membrane.	stress.biotic	plasma membrane	Jones AM (2014)	24833385	protein complementation assay
AT2G01420	PIN4	Encodes a putative auxin efflux carrier that is localized in developing and mature root meristems. It is involved in the maintenance of embryonic auxin gradients. A role for AtPIN4 in generating a sink for auxin below the quiescent center of the root meristem that is essential for auxin distribution and patterning is proposed. In the root, PIN4 is detected around the quiescent center and cells su…	hormone metabolism.auxin.signal transduction	plasma membrane	AT1G08960	AtCAX11	Encodes a member of the Potassium-dependent sodium-calcium exchanger like-family that localizes to the plasma membrane and nuclear periphery, and has a role in mediating high-afﬁnity K+ uptake and Na+ transport in yeast.	transport.calcium	plasma membrane	Jones AM (2014)	24833385	protein complementation assay
AT2G01420	PIN4	Encodes a putative auxin efflux carrier that is localized in developing and mature root meristems. It is involved in the maintenance of embryonic auxin gradients. A role for AtPIN4 in generating a sink for auxin below the quiescent center of the root meristem that is essential for auxin distribution and patterning is proposed. In the root, PIN4 is detected around the quiescent center and cells su…	hormone metabolism.auxin.signal transduction	plasma membrane	AT1G01620	PIP1;3	a member of the plasma membrane intrinsic protein subfamily PIP1. localizes to the plasma membrane and exhibits water transport activity in Xenopus oocyte. expressed ubiquitously and protein level decreases slightly during leaf development.	transport.Major Intrinsic Proteins.PIP	plasma membrane	Jones AM (2014)	24833385	protein complementation assay
AT2G01420	PIN4	Encodes a putative auxin efflux carrier that is localized in developing and mature root meristems. It is involved in the maintenance of embryonic auxin gradients. A role for AtPIN4 in generating a sink for auxin below the quiescent center of the root meristem that is essential for auxin distribution and patterning is proposed. In the root, PIN4 is detected around the quiescent center and cells su…	hormone metabolism.auxin.signal transduction	plasma membrane	AT3G21580	ABCI12	cobalt ion transmembrane transporter;(source:Araport11)	transport.metal	plastid	Jones AM (2014)	24833385	protein complementation assay
AT2G01420	PIN4	Encodes a putative auxin efflux carrier that is localized in developing and mature root meristems. It is involved in the maintenance of embryonic auxin gradients. A role for AtPIN4 in generating a sink for auxin below the quiescent center of the root meristem that is essential for auxin distribution and patterning is proposed. In the root, PIN4 is detected around the quiescent center and cells su…	hormone metabolism.auxin.signal transduction	plasma membrane	AT2G38330	At2g38330	MATE efflux family protein;(source:Araport11)	transport.misc	plastid	Jones AM (2014)	24833385	protein complementation assay
AT2G01420	PIN4	Encodes a putative auxin efflux carrier that is localized in developing and mature root meristems. It is involved in the maintenance of embryonic auxin gradients. A role for AtPIN4 in generating a sink for auxin below the quiescent center of the root meristem that is essential for auxin distribution and patterning is proposed. In the root, PIN4 is detected around the quiescent center and cells su…	hormone metabolism.auxin.signal transduction	plasma membrane	AT4G23010	AtUTR2	UDP-galactose transporter 2;(source:Araport11)	transport.NDP-sugars at the ER	golgi	Jones AM (2014)	24833385	protein complementation assay
AT2G01420	PIN4	Encodes a putative auxin efflux carrier that is localized in developing and mature root meristems. It is involved in the maintenance of embryonic auxin gradients. A role for AtPIN4 in generating a sink for auxin below the quiescent center of the root meristem that is essential for auxin distribution and patterning is proposed. In the root, PIN4 is detected around the quiescent center and cells su…	hormone metabolism.auxin.signal transduction	plasma membrane	AT1G74810	BOR5	HCO3- transporter family;(source:Araport11)	transport.unspecified anions	plasma membrane	Jones AM (2014)	24833385	protein complementation assay
AT2G01420	PIN4	Encodes a putative auxin efflux carrier that is localized in developing and mature root meristems. It is involved in the maintenance of embryonic auxin gradients. A role for AtPIN4 in generating a sink for auxin below the quiescent center of the root meristem that is essential for auxin distribution and patterning is proposed. In the root, PIN4 is detected around the quiescent center and cells su…	hormone metabolism.auxin.signal transduction	plasma membrane	AT3G66654	At3g66654	Cyclophilin-like peptidyl-prolyl cis-trans isomerase family protein;(source:Araport11)	#N/A	golgi	Jones AM (2014)	24833385	protein complementation assay
AT2G01420	PIN4	Encodes a putative auxin efflux carrier that is localized in developing and mature root meristems. It is involved in the maintenance of embryonic auxin gradients. A role for AtPIN4 in generating a sink for auxin below the quiescent center of the root meristem that is essential for auxin distribution and patterning is proposed. In the root, PIN4 is detected around the quiescent center and cells su…	hormone metabolism.auxin.signal transduction	plasma membrane	AT4G14455	AtBET12	Encodes a Bet1/Sft1-like SNARE protein, which can only partially suppresses the temperature-sensitive growth defect in sft1-1 yeast cells; however, it cannot support the deletion of the yeast BET1 gene (bet1Δ). In yeast, Bet1p is the v-SNARE (soluble N-ethylmaleimide-sensitive factor adaptor protein receptor, V-type) involved in trafficking between the ER and Golgi.	#N/A	golgi	Jones AM (2014)	24833385	protein complementation assay
AT2G01420	PIN4	Encodes a putative auxin efflux carrier that is localized in developing and mature root meristems. It is involved in the maintenance of embryonic auxin gradients. A role for AtPIN4 in generating a sink for auxin below the quiescent center of the root meristem that is essential for auxin distribution and patterning is proposed. In the root, PIN4 is detected around the quiescent center and cells su…	hormone metabolism.auxin.signal transduction	plasma membrane	AT2G36305	AtFACE-2	Encodes an endoprotease involved in the cleavage of prenylated CaaX-box proteins. In vitro, it can cleave a farnesylated tetrapeptide and it can promote membrane-localization of a farnesylated GFP:AtROP9 protein when both are expressed in yeast.	#N/A	endoplasmic reticulum	Jones AM (2014)	24833385	protein complementation assay
AT2G01420	PIN4	Encodes a putative auxin efflux carrier that is localized in developing and mature root meristems. It is involved in the maintenance of embryonic auxin gradients. A role for AtPIN4 in generating a sink for auxin below the quiescent center of the root meristem that is essential for auxin distribution and patterning is proposed. In the root, PIN4 is detected around the quiescent center and cells su…	hormone metabolism.auxin.signal transduction	plasma membrane	AT4G04700	CPK27	member of Calcium Dependent Protein Kinase	#N/A	cytosol	Jones AM (2014)	24833385	protein complementation assay
AT5G16530	PIN5	Encodes PIN5, an atypical member of the PIN family. PIN5 is a functional auxin transporter that is required for auxin-mediated development. PIN5 does not have a direct role in cell-to-cell transport but regulates intracellular auxin homeostasis and metabolism. PIN5 localizes, unlike other characterized plasma membrane PIN proteins, to endoplasmic reticulum (ER), presumably mediating auxin flow fr…	hormone metabolism.auxin.signal transduction	endoplasmic reticulum	AT3G06360	AGP27	Encodes an arabinogalactan-protein (AGP27).	cell wall.cell wall proteins.AGPs	extracellular	Jones AM (2014)	24833385	protein complementation assay
AT5G16530	PIN5	Encodes PIN5, an atypical member of the PIN family. PIN5 is a functional auxin transporter that is required for auxin-mediated development. PIN5 does not have a direct role in cell-to-cell transport but regulates intracellular auxin homeostasis and metabolism. PIN5 localizes, unlike other characterized plasma membrane PIN proteins, to endoplasmic reticulum (ER), presumably mediating auxin flow fr…	hormone metabolism.auxin.signal transduction	endoplasmic reticulum	AT1G35720	ANN1	Encodes a member of the annexin gene family, a diverse, multigene family of calcium-dependent, membrane-binding proteins. The protein was determined to have peroxidase activity. This activity is thought to be dependent on the presence of post-translational modifications (most likely phosphorylation). The protein was shown to be present as a mixture of monomer and homodimer. The homodimerization s…	cell.organisation	peroxisome	Jones AM (2014)	24833385	protein complementation assay
AT5G16530	PIN5	Encodes PIN5, an atypical member of the PIN family. PIN5 is a functional auxin transporter that is required for auxin-mediated development. PIN5 does not have a direct role in cell-to-cell transport but regulates intracellular auxin homeostasis and metabolism. PIN5 localizes, unlike other characterized plasma membrane PIN proteins, to endoplasmic reticulum (ER), presumably mediating auxin flow fr…	hormone metabolism.auxin.signal transduction	endoplasmic reticulum	AT5G25940	At5g25940	early nodulin-like protein;(source:Araport11)	development.unspecified	mitochondrion	Jones AM (2014)	24833385	protein complementation assay
AT5G16530	PIN5	Encodes PIN5, an atypical member of the PIN family. PIN5 is a functional auxin transporter that is required for auxin-mediated development. PIN5 does not have a direct role in cell-to-cell transport but regulates intracellular auxin homeostasis and metabolism. PIN5 localizes, unlike other characterized plasma membrane PIN proteins, to endoplasmic reticulum (ER), presumably mediating auxin flow fr…	hormone metabolism.auxin.signal transduction	endoplasmic reticulum	AT3G26370	At3g26370	O-fucosyltransferase family protein;(source:Araport11)	hormone metabolism.auxin.induced-regulated-responsive-activated	golgi	Jones AM (2014)	24833385	protein complementation assay
AT5G16530	PIN5	Encodes PIN5, an atypical member of the PIN family. PIN5 is a functional auxin transporter that is required for auxin-mediated development. PIN5 does not have a direct role in cell-to-cell transport but regulates intracellular auxin homeostasis and metabolism. PIN5 localizes, unlike other characterized plasma membrane PIN proteins, to endoplasmic reticulum (ER), presumably mediating auxin flow fr…	hormone metabolism.auxin.signal transduction	endoplasmic reticulum	AT1G27440	AtGUT1	IRX10 was identified as MUCI69 in a reverse genetic screen for MUCILAGE-RELATED genes. Mutations in this gene did not disrupt mucilage properties, likely due to the presence of the functionally redundant IRX10-L.	misc.UDP glucosyl and glucoronyl transferases	endoplasmic reticulum,extracellular	Jones AM (2014)	24833385	protein complementation assay
AT5G16530	PIN5	Encodes PIN5, an atypical member of the PIN family. PIN5 is a functional auxin transporter that is required for auxin-mediated development. PIN5 does not have a direct role in cell-to-cell transport but regulates intracellular auxin homeostasis and metabolism. PIN5 localizes, unlike other characterized plasma membrane PIN proteins, to endoplasmic reticulum (ER), presumably mediating auxin flow fr…	hormone metabolism.auxin.signal transduction	endoplasmic reticulum	AT2G41705	At2g41705	Encodes a fluoride export protein.	not assigned.no ontology	plasma membrane	Jones AM (2014)	24833385	protein complementation assay
AT5G16530	PIN5	Encodes PIN5, an atypical member of the PIN family. PIN5 is a functional auxin transporter that is required for auxin-mediated development. PIN5 does not have a direct role in cell-to-cell transport but regulates intracellular auxin homeostasis and metabolism. PIN5 localizes, unlike other characterized plasma membrane PIN proteins, to endoplasmic reticulum (ER), presumably mediating auxin flow fr…	hormone metabolism.auxin.signal transduction	endoplasmic reticulum	AT3G12180	At3g12180	Cornichon family protein;(source:Araport11)	not assigned.no ontology	extracellular	Jones AM (2014)	24833385	protein complementation assay
AT5G16530	PIN5	Encodes PIN5, an atypical member of the PIN family. PIN5 is a functional auxin transporter that is required for auxin-mediated development. PIN5 does not have a direct role in cell-to-cell transport but regulates intracellular auxin homeostasis and metabolism. PIN5 localizes, unlike other characterized plasma membrane PIN proteins, to endoplasmic reticulum (ER), presumably mediating auxin flow fr…	hormone metabolism.auxin.signal transduction	endoplasmic reticulum	AT3G28220	At3g28220	TRAF-like family protein;(source:Araport11)	not assigned.no ontology	plastid	Jones AM (2014)	24833385	protein complementation assay
AT5G16530	PIN5	Encodes PIN5, an atypical member of the PIN family. PIN5 is a functional auxin transporter that is required for auxin-mediated development. PIN5 does not have a direct role in cell-to-cell transport but regulates intracellular auxin homeostasis and metabolism. PIN5 localizes, unlike other characterized plasma membrane PIN proteins, to endoplasmic reticulum (ER), presumably mediating auxin flow fr…	hormone metabolism.auxin.signal transduction	endoplasmic reticulum	AT5G21920	AtYLMG2	YGGT family protein;(source:Araport11)	not assigned.no ontology	plastid	Jones AM (2014)	24833385	protein complementation assay
AT5G16530	PIN5	Encodes PIN5, an atypical member of the PIN family. PIN5 is a functional auxin transporter that is required for auxin-mediated development. PIN5 does not have a direct role in cell-to-cell transport but regulates intracellular auxin homeostasis and metabolism. PIN5 localizes, unlike other characterized plasma membrane PIN proteins, to endoplasmic reticulum (ER), presumably mediating auxin flow fr…	hormone metabolism.auxin.signal transduction	endoplasmic reticulum	AT4G36830	HOS3-1	GNS1/SUR4 membrane protein family;(source:Araport11)	not assigned.no ontology	plasma membrane	Jones AM (2014)	24833385	protein complementation assay
AT5G16530	PIN5	Encodes PIN5, an atypical member of the PIN family. PIN5 is a functional auxin transporter that is required for auxin-mediated development. PIN5 does not have a direct role in cell-to-cell transport but regulates intracellular auxin homeostasis and metabolism. PIN5 localizes, unlike other characterized plasma membrane PIN proteins, to endoplasmic reticulum (ER), presumably mediating auxin flow fr…	hormone metabolism.auxin.signal transduction	endoplasmic reticulum	AT4G10080	At4g10080	transmembrane protein;(source:Araport11)	not assigned.unknown	cytosol	Jones AM (2014)	24833385	protein complementation assay
AT5G16530	PIN5	Encodes PIN5, an atypical member of the PIN family. PIN5 is a functional auxin transporter that is required for auxin-mediated development. PIN5 does not have a direct role in cell-to-cell transport but regulates intracellular auxin homeostasis and metabolism. PIN5 localizes, unlike other characterized plasma membrane PIN proteins, to endoplasmic reticulum (ER), presumably mediating auxin flow fr…	hormone metabolism.auxin.signal transduction	endoplasmic reticulum	AT3G59900	ARGOS	Encodes ARGOS (Auxin-Regulated Gene Involved in Organ Size). Inducible by auxin. Involved in lateral organ size control. Transgenic plants expressing sense or antisense ARGOS cDNA display enlarged or reduced aerial organs, respectively. The alteration in organ size is attributable mainly to changes in cell number and the duration of organ growth.	not assigned.unknown	endoplasmic reticulum	Jones AM (2014)	24833385	protein complementation assay
AT5G16530	PIN5	Encodes PIN5, an atypical member of the PIN family. PIN5 is a functional auxin transporter that is required for auxin-mediated development. PIN5 does not have a direct role in cell-to-cell transport but regulates intracellular auxin homeostasis and metabolism. PIN5 localizes, unlike other characterized plasma membrane PIN proteins, to endoplasmic reticulum (ER), presumably mediating auxin flow fr…	hormone metabolism.auxin.signal transduction	endoplasmic reticulum	AT1G07860	At1g07860	Serine/Threonine-kinase RLCKVII protein;(source:Araport11)	not assigned.unknown	plasma membrane	Jones AM (2014)	24833385	protein complementation assay
AT5G16530	PIN5	Encodes PIN5, an atypical member of the PIN family. PIN5 is a functional auxin transporter that is required for auxin-mediated development. PIN5 does not have a direct role in cell-to-cell transport but regulates intracellular auxin homeostasis and metabolism. PIN5 localizes, unlike other characterized plasma membrane PIN proteins, to endoplasmic reticulum (ER), presumably mediating auxin flow fr…	hormone metabolism.auxin.signal transduction	endoplasmic reticulum	AT1G16170	At1g16170	ephrin-A3 protein;(source:Araport11)	not assigned.unknown	endoplasmic reticulum	Jones AM (2014)	24833385	protein complementation assay
AT5G16530	PIN5	Encodes PIN5, an atypical member of the PIN family. PIN5 is a functional auxin transporter that is required for auxin-mediated development. PIN5 does not have a direct role in cell-to-cell transport but regulates intracellular auxin homeostasis and metabolism. PIN5 localizes, unlike other characterized plasma membrane PIN proteins, to endoplasmic reticulum (ER), presumably mediating auxin flow fr…	hormone metabolism.auxin.signal transduction	endoplasmic reticulum	AT1G34640	At1g34640	peptidase;(source:Araport11)	not assigned.unknown	extracellular	Jones AM (2014)	24833385	protein complementation assay
AT5G16530	PIN5	Encodes PIN5, an atypical member of the PIN family. PIN5 is a functional auxin transporter that is required for auxin-mediated development. PIN5 does not have a direct role in cell-to-cell transport but regulates intracellular auxin homeostasis and metabolism. PIN5 localizes, unlike other characterized plasma membrane PIN proteins, to endoplasmic reticulum (ER), presumably mediating auxin flow fr…	hormone metabolism.auxin.signal transduction	endoplasmic reticulum	AT1G47640	At1g47640	seven transmembrane domain protein;(source:Araport11)	not assigned.unknown	plasma membrane	Jones AM (2014)	24833385	protein complementation assay
AT5G16530	PIN5	Encodes PIN5, an atypical member of the PIN family. PIN5 is a functional auxin transporter that is required for auxin-mediated development. PIN5 does not have a direct role in cell-to-cell transport but regulates intracellular auxin homeostasis and metabolism. PIN5 localizes, unlike other characterized plasma membrane PIN proteins, to endoplasmic reticulum (ER), presumably mediating auxin flow fr…	hormone metabolism.auxin.signal transduction	endoplasmic reticulum	AT1G65720	At1g65720	transmembrane protein;(source:Araport11)	not assigned.unknown	extracellular	Jones AM (2014)	24833385	protein complementation assay
AT5G16530	PIN5	Encodes PIN5, an atypical member of the PIN family. PIN5 is a functional auxin transporter that is required for auxin-mediated development. PIN5 does not have a direct role in cell-to-cell transport but regulates intracellular auxin homeostasis and metabolism. PIN5 localizes, unlike other characterized plasma membrane PIN proteins, to endoplasmic reticulum (ER), presumably mediating auxin flow fr…	hormone metabolism.auxin.signal transduction	endoplasmic reticulum	AT3G29034	At3g29034	transmembrane protein;(source:Araport11)	not assigned.unknown	cytosol	Jones AM (2014)	24833385	protein complementation assay
AT5G16530	PIN5	Encodes PIN5, an atypical member of the PIN family. PIN5 is a functional auxin transporter that is required for auxin-mediated development. PIN5 does not have a direct role in cell-to-cell transport but regulates intracellular auxin homeostasis and metabolism. PIN5 localizes, unlike other characterized plasma membrane PIN proteins, to endoplasmic reticulum (ER), presumably mediating auxin flow fr…	hormone metabolism.auxin.signal transduction	endoplasmic reticulum	AT4G12590	At4g12590	ER membrane protein complex subunit-like protein (Protein of unknown function DUF106, transmembrane);(source:Araport11)	not assigned.unknown	endoplasmic reticulum	Jones AM (2014)	24833385	protein complementation assay
AT5G16530	PIN5	Encodes PIN5, an atypical member of the PIN family. PIN5 is a functional auxin transporter that is required for auxin-mediated development. PIN5 does not have a direct role in cell-to-cell transport but regulates intracellular auxin homeostasis and metabolism. PIN5 localizes, unlike other characterized plasma membrane PIN proteins, to endoplasmic reticulum (ER), presumably mediating auxin flow fr…	hormone metabolism.auxin.signal transduction	endoplasmic reticulum	AT4G30500	At4g30500	transmembrane protein (DUF788);(source:Araport11)	not assigned.unknown	plasma membrane	Jones AM (2014)	24833385	protein complementation assay
AT5G16530	PIN5	Encodes PIN5, an atypical member of the PIN family. PIN5 is a functional auxin transporter that is required for auxin-mediated development. PIN5 does not have a direct role in cell-to-cell transport but regulates intracellular auxin homeostasis and metabolism. PIN5 localizes, unlike other characterized plasma membrane PIN proteins, to endoplasmic reticulum (ER), presumably mediating auxin flow fr…	hormone metabolism.auxin.signal transduction	endoplasmic reticulum	AT5G03345	At5g03345	membrane magnesium transporter-like protein;(source:Araport11)	not assigned.unknown	endoplasmic reticulum	Jones AM (2014)	24833385	protein complementation assay
AT5G16530	PIN5	Encodes PIN5, an atypical member of the PIN family. PIN5 is a functional auxin transporter that is required for auxin-mediated development. PIN5 does not have a direct role in cell-to-cell transport but regulates intracellular auxin homeostasis and metabolism. PIN5 localizes, unlike other characterized plasma membrane PIN proteins, to endoplasmic reticulum (ER), presumably mediating auxin flow fr…	hormone metabolism.auxin.signal transduction	endoplasmic reticulum	AT5G49540	At5g49540	Rab5-interacting family protein;(source:Araport11)	not assigned.unknown	plasma membrane	Jones AM (2014)	24833385	protein complementation assay
AT5G16530	PIN5	Encodes PIN5, an atypical member of the PIN family. PIN5 is a functional auxin transporter that is required for auxin-mediated development. PIN5 does not have a direct role in cell-to-cell transport but regulates intracellular auxin homeostasis and metabolism. PIN5 localizes, unlike other characterized plasma membrane PIN proteins, to endoplasmic reticulum (ER), presumably mediating auxin flow fr…	hormone metabolism.auxin.signal transduction	endoplasmic reticulum	AT5G11890	EMB3135	harpin-induced protein;(source:Araport11)	not assigned.unknown	plasma membrane	Jones AM (2014)	24833385	protein complementation assay
AT5G16530	PIN5	Encodes PIN5, an atypical member of the PIN family. PIN5 is a functional auxin transporter that is required for auxin-mediated development. PIN5 does not have a direct role in cell-to-cell transport but regulates intracellular auxin homeostasis and metabolism. PIN5 localizes, unlike other characterized plasma membrane PIN proteins, to endoplasmic reticulum (ER), presumably mediating auxin flow fr…	hormone metabolism.auxin.signal transduction	endoplasmic reticulum	AT4G30850	HHP2	heptahelical transmembrane protein homologous to human adiponectin receptors and progestin receptors	not assigned.unknown	golgi	Jones AM (2014)	24833385	protein complementation assay
AT5G16530	PIN5	Encodes PIN5, an atypical member of the PIN family. PIN5 is a functional auxin transporter that is required for auxin-mediated development. PIN5 does not have a direct role in cell-to-cell transport but regulates intracellular auxin homeostasis and metabolism. PIN5 localizes, unlike other characterized plasma membrane PIN proteins, to endoplasmic reticulum (ER), presumably mediating auxin flow fr…	hormone metabolism.auxin.signal transduction	endoplasmic reticulum	AT4G37680	HHP4	heptahelical transmembrane protein HHP4	not assigned.unknown	plasma membrane,golgi	Jones AM (2014)	24833385	protein complementation assay
AT5G16530	PIN5	Encodes PIN5, an atypical member of the PIN family. PIN5 is a functional auxin transporter that is required for auxin-mediated development. PIN5 does not have a direct role in cell-to-cell transport but regulates intracellular auxin homeostasis and metabolism. PIN5 localizes, unlike other characterized plasma membrane PIN proteins, to endoplasmic reticulum (ER), presumably mediating auxin flow fr…	hormone metabolism.auxin.signal transduction	endoplasmic reticulum	AT4G25360	TBL18	Encodes a member of the TBL (TRICHOME BIREFRINGENCE-LIKE) gene family containing a plant-specific DUF231 (domain of unknown function) domain. TBL gene family has 46 members, two of which (TBR/AT5G06700 and TBL3/AT5G01360) have been shown to be involved in the synthesis and deposition of secondary wall cellulose, presumably by influencing the esterification state of pectic polymers. A nomenclature…	not assigned.unknown	plastid	Jones AM (2014)	24833385	protein complementation assay
AT5G16530	PIN5	Encodes PIN5, an atypical member of the PIN family. PIN5 is a functional auxin transporter that is required for auxin-mediated development. PIN5 does not have a direct role in cell-to-cell transport but regulates intracellular auxin homeostasis and metabolism. PIN5 localizes, unlike other characterized plasma membrane PIN proteins, to endoplasmic reticulum (ER), presumably mediating auxin flow fr…	hormone metabolism.auxin.signal transduction	endoplasmic reticulum	AT1G17280	UBC34	ubiquitin-conjugating enzyme 34;(source:Araport11)	protein.degradation.ubiquitin	cytosol,peroxisome	Jones AM (2014)	24833385	protein complementation assay
AT5G16530	PIN5	Encodes PIN5, an atypical member of the PIN family. PIN5 is a functional auxin transporter that is required for auxin-mediated development. PIN5 does not have a direct role in cell-to-cell transport but regulates intracellular auxin homeostasis and metabolism. PIN5 localizes, unlike other characterized plasma membrane PIN proteins, to endoplasmic reticulum (ER), presumably mediating auxin flow fr…	hormone metabolism.auxin.signal transduction	endoplasmic reticulum	AT3G17000	UBC32	ubiquitin-conjugating enzyme 32;(source:Araport11)	protein.degradation.ubiquitin.E2	cytosol	Jones AM (2014)	24833385	protein complementation assay
AT5G16530	PIN5	Encodes PIN5, an atypical member of the PIN family. PIN5 is a functional auxin transporter that is required for auxin-mediated development. PIN5 does not have a direct role in cell-to-cell transport but regulates intracellular auxin homeostasis and metabolism. PIN5 localizes, unlike other characterized plasma membrane PIN proteins, to endoplasmic reticulum (ER), presumably mediating auxin flow fr…	hormone metabolism.auxin.signal transduction	endoplasmic reticulum	AT2G41490	GPT	UDP-GlcNAc:dolichol phosphate N-acetylglucosamine-1-phosphate transferase	protein.glycosylation	plasma membrane	Jones AM (2014)	24833385	protein complementation assay
AT5G16530	PIN5	Encodes PIN5, an atypical member of the PIN family. PIN5 is a functional auxin transporter that is required for auxin-mediated development. PIN5 does not have a direct role in cell-to-cell transport but regulates intracellular auxin homeostasis and metabolism. PIN5 localizes, unlike other characterized plasma membrane PIN proteins, to endoplasmic reticulum (ER), presumably mediating auxin flow fr…	hormone metabolism.auxin.signal transduction	endoplasmic reticulum	AT2G34180	AtWL2	Encodes CBL-interacting protein kinase 13 (CIPK13).	protein.postranslational modification	plastid	Jones AM (2014)	24833385	protein complementation assay
AT5G16530	PIN5	Encodes PIN5, an atypical member of the PIN family. PIN5 is a functional auxin transporter that is required for auxin-mediated development. PIN5 does not have a direct role in cell-to-cell transport but regulates intracellular auxin homeostasis and metabolism. PIN5 localizes, unlike other characterized plasma membrane PIN proteins, to endoplasmic reticulum (ER), presumably mediating auxin flow fr…	hormone metabolism.auxin.signal transduction	endoplasmic reticulum	AT3G10640	VPS60.1	SNF7 family protein;(source:Araport11)	RNA.regulation of transcription.SNF7	nucleus	Jones AM (2014)	24833385	protein complementation assay
AT5G16530	PIN5	Encodes PIN5, an atypical member of the PIN family. PIN5 is a functional auxin transporter that is required for auxin-mediated development. PIN5 does not have a direct role in cell-to-cell transport but regulates intracellular auxin homeostasis and metabolism. PIN5 localizes, unlike other characterized plasma membrane PIN proteins, to endoplasmic reticulum (ER), presumably mediating auxin flow fr…	hormone metabolism.auxin.signal transduction	endoplasmic reticulum	AT2G26180	IQD6	Transient Expression of Pro35S:YFP-IQD5 in leaves of N. benthamiana alters microtubule organization.	signalling.calcium	nucleus	Jones AM (2014)	24833385	protein complementation assay
AT5G16530	PIN5	Encodes PIN5, an atypical member of the PIN family. PIN5 is a functional auxin transporter that is required for auxin-mediated development. PIN5 does not have a direct role in cell-to-cell transport but regulates intracellular auxin homeostasis and metabolism. PIN5 localizes, unlike other characterized plasma membrane PIN proteins, to endoplasmic reticulum (ER), presumably mediating auxin flow fr…	hormone metabolism.auxin.signal transduction	endoplasmic reticulum	AT1G21240	WAK3	encodes a wall-associated kinase The mRNA is cell-to-cell mobile.	signalling.receptor kinases.wall associated kinase	plasma membrane	Jones AM (2014)	24833385	protein complementation assay
AT5G16530	PIN5	Encodes PIN5, an atypical member of the PIN family. PIN5 is a functional auxin transporter that is required for auxin-mediated development. PIN5 does not have a direct role in cell-to-cell transport but regulates intracellular auxin homeostasis and metabolism. PIN5 localizes, unlike other characterized plasma membrane PIN proteins, to endoplasmic reticulum (ER), presumably mediating auxin flow fr…	hormone metabolism.auxin.signal transduction	endoplasmic reticulum	AT5G06320	NHL3	encodes a protein whose sequence is similar to tobacco hairpin-induced gene (HIN1) and Arabidopsis non-race specific disease resistance gene (NDR1). Expression of this gene is induced by cucumber mosaic virus, spermine and Pseudomonas syringae pv. tomato DC3000. The gene product is localized to the plasma membrane.	stress.biotic	plasma membrane	Jones AM (2014)	24833385	protein complementation assay
AT5G16530	PIN5	Encodes PIN5, an atypical member of the PIN family. PIN5 is a functional auxin transporter that is required for auxin-mediated development. PIN5 does not have a direct role in cell-to-cell transport but regulates intracellular auxin homeostasis and metabolism. PIN5 localizes, unlike other characterized plasma membrane PIN proteins, to endoplasmic reticulum (ER), presumably mediating auxin flow fr…	hormone metabolism.auxin.signal transduction	endoplasmic reticulum	AT3G55090	ABCG16	Belongs to a clade of five Arabidopsis thaliana ABCG half-transporters that are required for synthesis of an effective suberin barrier in roots and seed coats (ABCG2, ABCG6, and ABCG20) and for synthesis of an intact pollen wall (ABCG1 and ABCG16).	transport.ABC transporters and multidrug resistance systems	plasma membrane	Jones AM (2014)	24833385	protein complementation assay
AT5G16530	PIN5	Encodes PIN5, an atypical member of the PIN family. PIN5 is a functional auxin transporter that is required for auxin-mediated development. PIN5 does not have a direct role in cell-to-cell transport but regulates intracellular auxin homeostasis and metabolism. PIN5 localizes, unlike other characterized plasma membrane PIN proteins, to endoplasmic reticulum (ER), presumably mediating auxin flow fr…	hormone metabolism.auxin.signal transduction	endoplasmic reticulum	AT1G08960	AtCAX11	Encodes a member of the Potassium-dependent sodium-calcium exchanger like-family that localizes to the plasma membrane and nuclear periphery, and has a role in mediating high-afﬁnity K+ uptake and Na+ transport in yeast.	transport.calcium	plasma membrane	Jones AM (2014)	24833385	protein complementation assay
AT5G16530	PIN5	Encodes PIN5, an atypical member of the PIN family. PIN5 is a functional auxin transporter that is required for auxin-mediated development. PIN5 does not have a direct role in cell-to-cell transport but regulates intracellular auxin homeostasis and metabolism. PIN5 localizes, unlike other characterized plasma membrane PIN proteins, to endoplasmic reticulum (ER), presumably mediating auxin flow fr…	hormone metabolism.auxin.signal transduction	endoplasmic reticulum	AT1G01620	PIP1;3	a member of the plasma membrane intrinsic protein subfamily PIP1. localizes to the plasma membrane and exhibits water transport activity in Xenopus oocyte. expressed ubiquitously and protein level decreases slightly during leaf development.	transport.Major Intrinsic Proteins.PIP	plasma membrane	Jones AM (2014)	24833385	protein complementation assay
AT5G16530	PIN5	Encodes PIN5, an atypical member of the PIN family. PIN5 is a functional auxin transporter that is required for auxin-mediated development. PIN5 does not have a direct role in cell-to-cell transport but regulates intracellular auxin homeostasis and metabolism. PIN5 localizes, unlike other characterized plasma membrane PIN proteins, to endoplasmic reticulum (ER), presumably mediating auxin flow fr…	hormone metabolism.auxin.signal transduction	endoplasmic reticulum	AT2G47600	AtMHX	Encodes a magnesium/proton exchanger, member of putative Na+/Ca2+ antiporter gene family	transport.metal	vacuole	Jones AM (2014)	24833385	protein complementation assay
AT5G16530	PIN5	Encodes PIN5, an atypical member of the PIN family. PIN5 is a functional auxin transporter that is required for auxin-mediated development. PIN5 does not have a direct role in cell-to-cell transport but regulates intracellular auxin homeostasis and metabolism. PIN5 localizes, unlike other characterized plasma membrane PIN proteins, to endoplasmic reticulum (ER), presumably mediating auxin flow fr…	hormone metabolism.auxin.signal transduction	endoplasmic reticulum	AT1G14360	AtUTR3	UDP-galactose transporter 3;(source:Araport11)	transport.NDP-sugars at the ER	endoplasmic reticulum,plasma membrane	Jones AM (2014)	24833385	protein complementation assay
AT5G16530	PIN5	Encodes PIN5, an atypical member of the PIN family. PIN5 is a functional auxin transporter that is required for auxin-mediated development. PIN5 does not have a direct role in cell-to-cell transport but regulates intracellular auxin homeostasis and metabolism. PIN5 localizes, unlike other characterized plasma membrane PIN proteins, to endoplasmic reticulum (ER), presumably mediating auxin flow fr…	hormone metabolism.auxin.signal transduction	endoplasmic reticulum	AT2G40540	AtKT2	putative potassium transporter AtKT2p (AtKT2) mRNA,	transport.potassium	plasma membrane	Jones AM (2014)	24833385	protein complementation assay
AT5G16530	PIN5	Encodes PIN5, an atypical member of the PIN family. PIN5 is a functional auxin transporter that is required for auxin-mediated development. PIN5 does not have a direct role in cell-to-cell transport but regulates intracellular auxin homeostasis and metabolism. PIN5 localizes, unlike other characterized plasma membrane PIN proteins, to endoplasmic reticulum (ER), presumably mediating auxin flow fr…	hormone metabolism.auxin.signal transduction	endoplasmic reticulum	AT3G66654	At3g66654	Cyclophilin-like peptidyl-prolyl cis-trans isomerase family protein;(source:Araport11)	#N/A	golgi	Jones AM (2014)	24833385	protein complementation assay
AT5G16530	PIN5	Encodes PIN5, an atypical member of the PIN family. PIN5 is a functional auxin transporter that is required for auxin-mediated development. PIN5 does not have a direct role in cell-to-cell transport but regulates intracellular auxin homeostasis and metabolism. PIN5 localizes, unlike other characterized plasma membrane PIN proteins, to endoplasmic reticulum (ER), presumably mediating auxin flow fr…	hormone metabolism.auxin.signal transduction	endoplasmic reticulum	AT4G14455	AtBET12	Encodes a Bet1/Sft1-like SNARE protein, which can only partially suppresses the temperature-sensitive growth defect in sft1-1 yeast cells; however, it cannot support the deletion of the yeast BET1 gene (bet1Δ). In yeast, Bet1p is the v-SNARE (soluble N-ethylmaleimide-sensitive factor adaptor protein receptor, V-type) involved in trafficking between the ER and Golgi.	#N/A	golgi	Jones AM (2014)	24833385	protein complementation assay
AT1G77110	PIN6	Rate-limiting factor in saturable efflux of auxins. PINs are directly involved of in catalyzing cellular auxin efflux.	hormone metabolism.auxin.signal transduction	plasma membrane	AT1G14020	At1g14020	O-fucosyltransferase family protein;(source:Araport11)	hormone metabolism.auxin.induced-regulated-responsive-activated	golgi	Jones AM (2014)	24833385	protein complementation assay
AT1G77110	PIN6	Rate-limiting factor in saturable efflux of auxins. PINs are directly involved of in catalyzing cellular auxin efflux.	hormone metabolism.auxin.signal transduction	plasma membrane	AT3G26370	At3g26370	O-fucosyltransferase family protein;(source:Araport11)	hormone metabolism.auxin.induced-regulated-responsive-activated	golgi	Jones AM (2014)	24833385	protein complementation assay
AT1G77110	PIN6	Rate-limiting factor in saturable efflux of auxins. PINs are directly involved of in catalyzing cellular auxin efflux.	hormone metabolism.auxin.signal transduction	plasma membrane	AT3G28220	At3g28220	TRAF-like family protein;(source:Araport11)	not assigned.no ontology	plastid	Jones AM (2014)	24833385	protein complementation assay
AT1G77110	PIN6	Rate-limiting factor in saturable efflux of auxins. PINs are directly involved of in catalyzing cellular auxin efflux.	hormone metabolism.auxin.signal transduction	plasma membrane	AT4G01410	At4g01410	Late embryogenesis abundant (LEA) hydroxyproline-rich glycoprotein family;(source:Araport11)	not assigned.no ontology	plasma membrane	Jones AM (2014)	24833385	protein complementation assay
AT1G77110	PIN6	Rate-limiting factor in saturable efflux of auxins. PINs are directly involved of in catalyzing cellular auxin efflux.	hormone metabolism.auxin.signal transduction	plasma membrane	AT1G07860	At1g07860	Serine/Threonine-kinase RLCKVII protein;(source:Araport11)	not assigned.unknown	plasma membrane	Jones AM (2014)	24833385	protein complementation assay
AT1G77110	PIN6	Rate-limiting factor in saturable efflux of auxins. PINs are directly involved of in catalyzing cellular auxin efflux.	hormone metabolism.auxin.signal transduction	plasma membrane	AT1G14990	At1g14990	transmembrane protein;(source:Araport11)	not assigned.unknown	mitochondrion	Jones AM (2014)	24833385	protein complementation assay
AT1G77110	PIN6	Rate-limiting factor in saturable efflux of auxins. PINs are directly involved of in catalyzing cellular auxin efflux.	hormone metabolism.auxin.signal transduction	plasma membrane	AT1G16170	At1g16170	ephrin-A3 protein;(source:Araport11)	not assigned.unknown	endoplasmic reticulum	Jones AM (2014)	24833385	protein complementation assay
AT1G77110	PIN6	Rate-limiting factor in saturable efflux of auxins. PINs are directly involved of in catalyzing cellular auxin efflux.	hormone metabolism.auxin.signal transduction	plasma membrane	AT1G34640	At1g34640	peptidase;(source:Araport11)	not assigned.unknown	extracellular	Jones AM (2014)	24833385	protein complementation assay
AT1G77110	PIN6	Rate-limiting factor in saturable efflux of auxins. PINs are directly involved of in catalyzing cellular auxin efflux.	hormone metabolism.auxin.signal transduction	plasma membrane	AT1G47640	At1g47640	seven transmembrane domain protein;(source:Araport11)	not assigned.unknown	plasma membrane	Jones AM (2014)	24833385	protein complementation assay
AT1G77110	PIN6	Rate-limiting factor in saturable efflux of auxins. PINs are directly involved of in catalyzing cellular auxin efflux.	hormone metabolism.auxin.signal transduction	plasma membrane	AT1G65720	At1g65720	transmembrane protein;(source:Araport11)	not assigned.unknown	extracellular	Jones AM (2014)	24833385	protein complementation assay
AT1G77110	PIN6	Rate-limiting factor in saturable efflux of auxins. PINs are directly involved of in catalyzing cellular auxin efflux.	hormone metabolism.auxin.signal transduction	plasma membrane	AT3G52070	At3g52070	RNA/RNP complex-1-interacting phosphatase;(source:Araport11)	not assigned.unknown	plastid	Jones AM (2014)	24833385	protein complementation assay
AT1G77110	PIN6	Rate-limiting factor in saturable efflux of auxins. PINs are directly involved of in catalyzing cellular auxin efflux.	hormone metabolism.auxin.signal transduction	plasma membrane	AT5G03545	AT4	Expressed in response to phosphate starvation, this response is enhanced by the presence of IAA. Additionally, its expression is responsive to both phosphate (Pi) and phosphite (Phi) in shoots. The mRNA is cell-to-cell mobile.	not assigned.unknown	plasma membrane	Jones AM (2014)	24833385	protein complementation assay
AT1G77110	PIN6	Rate-limiting factor in saturable efflux of auxins. PINs are directly involved of in catalyzing cellular auxin efflux.	hormone metabolism.auxin.signal transduction	plasma membrane	AT5G03345	At5g03345	membrane magnesium transporter-like protein;(source:Araport11)	not assigned.unknown	endoplasmic reticulum	Jones AM (2014)	24833385	protein complementation assay
AT1G77110	PIN6	Rate-limiting factor in saturable efflux of auxins. PINs are directly involved of in catalyzing cellular auxin efflux.	hormone metabolism.auxin.signal transduction	plasma membrane	AT5G49540	At5g49540	Rab5-interacting family protein;(source:Araport11)	not assigned.unknown	plasma membrane	Jones AM (2014)	24833385	protein complementation assay
AT1G77110	PIN6	Rate-limiting factor in saturable efflux of auxins. PINs are directly involved of in catalyzing cellular auxin efflux.	hormone metabolism.auxin.signal transduction	plasma membrane	AT5G11890	EMB3135	harpin-induced protein;(source:Araport11)	not assigned.unknown	plasma membrane	Jones AM (2014)	24833385	protein complementation assay
AT1G77110	PIN6	Rate-limiting factor in saturable efflux of auxins. PINs are directly involved of in catalyzing cellular auxin efflux.	hormone metabolism.auxin.signal transduction	plasma membrane	AT4G30850	HHP2	heptahelical transmembrane protein homologous to human adiponectin receptors and progestin receptors	not assigned.unknown	golgi	Jones AM (2014)	24833385	protein complementation assay
AT1G77110	PIN6	Rate-limiting factor in saturable efflux of auxins. PINs are directly involved of in catalyzing cellular auxin efflux.	hormone metabolism.auxin.signal transduction	plasma membrane	AT4G37680	HHP4	heptahelical transmembrane protein HHP4	not assigned.unknown	plasma membrane,golgi	Jones AM (2014)	24833385	protein complementation assay
AT1G77110	PIN6	Rate-limiting factor in saturable efflux of auxins. PINs are directly involved of in catalyzing cellular auxin efflux.	hormone metabolism.auxin.signal transduction	plasma membrane	AT4G25360	TBL18	Encodes a member of the TBL (TRICHOME BIREFRINGENCE-LIKE) gene family containing a plant-specific DUF231 (domain of unknown function) domain. TBL gene family has 46 members, two of which (TBR/AT5G06700 and TBL3/AT5G01360) have been shown to be involved in the synthesis and deposition of secondary wall cellulose, presumably by influencing the esterification state of pectic polymers. A nomenclature…	not assigned.unknown	plastid	Jones AM (2014)	24833385	protein complementation assay
AT1G77110	PIN6	Rate-limiting factor in saturable efflux of auxins. PINs are directly involved of in catalyzing cellular auxin efflux.	hormone metabolism.auxin.signal transduction	plasma membrane	AT1G17280	UBC34	ubiquitin-conjugating enzyme 34;(source:Araport11)	protein.degradation.ubiquitin	cytosol,peroxisome	Jones AM (2014)	24833385	protein complementation assay
AT1G77110	PIN6	Rate-limiting factor in saturable efflux of auxins. PINs are directly involved of in catalyzing cellular auxin efflux.	hormone metabolism.auxin.signal transduction	plasma membrane	AT2G41490	GPT	UDP-GlcNAc:dolichol phosphate N-acetylglucosamine-1-phosphate transferase	protein.glycosylation	plasma membrane	Jones AM (2014)	24833385	protein complementation assay
AT1G77110	PIN6	Rate-limiting factor in saturable efflux of auxins. PINs are directly involved of in catalyzing cellular auxin efflux.	hormone metabolism.auxin.signal transduction	plasma membrane	AT5G06320	NHL3	encodes a protein whose sequence is similar to tobacco hairpin-induced gene (HIN1) and Arabidopsis non-race specific disease resistance gene (NDR1). Expression of this gene is induced by cucumber mosaic virus, spermine and Pseudomonas syringae pv. tomato DC3000. The gene product is localized to the plasma membrane.	stress.biotic	plasma membrane	Jones AM (2014)	24833385	protein complementation assay
AT1G77110	PIN6	Rate-limiting factor in saturable efflux of auxins. PINs are directly involved of in catalyzing cellular auxin efflux.	hormone metabolism.auxin.signal transduction	plasma membrane	AT1G08960	AtCAX11	Encodes a member of the Potassium-dependent sodium-calcium exchanger like-family that localizes to the plasma membrane and nuclear periphery, and has a role in mediating high-afﬁnity K+ uptake and Na+ transport in yeast.	transport.calcium	plasma membrane	Jones AM (2014)	24833385	protein complementation assay
AT1G77110	PIN6	Rate-limiting factor in saturable efflux of auxins. PINs are directly involved of in catalyzing cellular auxin efflux.	hormone metabolism.auxin.signal transduction	plasma membrane	AT1G01620	PIP1;3	a member of the plasma membrane intrinsic protein subfamily PIP1. localizes to the plasma membrane and exhibits water transport activity in Xenopus oocyte. expressed ubiquitously and protein level decreases slightly during leaf development.	transport.Major Intrinsic Proteins.PIP	plasma membrane	Jones AM (2014)	24833385	protein complementation assay
AT1G77110	PIN6	Rate-limiting factor in saturable efflux of auxins. PINs are directly involved of in catalyzing cellular auxin efflux.	hormone metabolism.auxin.signal transduction	plasma membrane	AT3G21580	ABCI12	cobalt ion transmembrane transporter;(source:Araport11)	transport.metal	plastid	Jones AM (2014)	24833385	protein complementation assay
AT1G77110	PIN6	Rate-limiting factor in saturable efflux of auxins. PINs are directly involved of in catalyzing cellular auxin efflux.	hormone metabolism.auxin.signal transduction	plasma membrane	AT2G47600	AtMHX	Encodes a magnesium/proton exchanger, member of putative Na+/Ca2+ antiporter gene family	transport.metal	vacuole	Jones AM (2014)	24833385	protein complementation assay
AT1G77110	PIN6	Rate-limiting factor in saturable efflux of auxins. PINs are directly involved of in catalyzing cellular auxin efflux.	hormone metabolism.auxin.signal transduction	plasma membrane	AT2G38330	At2g38330	MATE efflux family protein;(source:Araport11)	transport.misc	plastid	Jones AM (2014)	24833385	protein complementation assay
AT1G77110	PIN6	Rate-limiting factor in saturable efflux of auxins. PINs are directly involved of in catalyzing cellular auxin efflux.	hormone metabolism.auxin.signal transduction	plasma membrane	AT3G66654	At3g66654	Cyclophilin-like peptidyl-prolyl cis-trans isomerase family protein;(source:Araport11)	#N/A	golgi	Jones AM (2014)	24833385	protein complementation assay
AT1G77110	PIN6	Rate-limiting factor in saturable efflux of auxins. PINs are directly involved of in catalyzing cellular auxin efflux.	hormone metabolism.auxin.signal transduction	plasma membrane	AT4G14455	AtBET12	Encodes a Bet1/Sft1-like SNARE protein, which can only partially suppresses the temperature-sensitive growth defect in sft1-1 yeast cells; however, it cannot support the deletion of the yeast BET1 gene (bet1Δ). In yeast, Bet1p is the v-SNARE (soluble N-ethylmaleimide-sensitive factor adaptor protein receptor, V-type) involved in trafficking between the ER and Golgi.	#N/A	golgi	Jones AM (2014)	24833385	protein complementation assay
AT1G77110	PIN6	Rate-limiting factor in saturable efflux of auxins. PINs are directly involved of in catalyzing cellular auxin efflux.	hormone metabolism.auxin.signal transduction	plasma membrane	AT2G36305	AtFACE-2	Encodes an endoprotease involved in the cleavage of prenylated CaaX-box proteins. In vitro, it can cleave a farnesylated tetrapeptide and it can promote membrane-localization of a farnesylated GFP:AtROP9 protein when both are expressed in yeast.	#N/A	endoplasmic reticulum	Jones AM (2014)	24833385	protein complementation assay
AT1G23080	PIN7	Encodes a novel component of auxin efflux that is located apically in the basal cell and is involved during embryogenesis in setting up the apical-basal axis in the embryo. It is also involved in pattern specification during root development. In roots, it is expressed at lateral and basal membranes of provascular cells in the meristem and elongation zone, whereas in the columella cells it coincid…	hormone metabolism.auxin.signal transduction	plasma membrane	AT2G41705	At2g41705	Encodes a fluoride export protein.	not assigned.no ontology	plasma membrane	Jones AM (2014)	24833385	protein complementation assay
AT1G23080	PIN7	Encodes a novel component of auxin efflux that is located apically in the basal cell and is involved during embryogenesis in setting up the apical-basal axis in the embryo. It is also involved in pattern specification during root development. In roots, it is expressed at lateral and basal membranes of provascular cells in the meristem and elongation zone, whereas in the columella cells it coincid…	hormone metabolism.auxin.signal transduction	plasma membrane	AT2G22180	At2g22180	hydroxyproline-rich glycoprotein family protein;(source:Araport11)	not assigned.no ontology.hydroxyproline rich proteins	nucleus	Jones AM (2014)	24833385	protein complementation assay
AT1G23080	PIN7	Encodes a novel component of auxin efflux that is located apically in the basal cell and is involved during embryogenesis in setting up the apical-basal axis in the embryo. It is also involved in pattern specification during root development. In roots, it is expressed at lateral and basal membranes of provascular cells in the meristem and elongation zone, whereas in the columella cells it coincid…	hormone metabolism.auxin.signal transduction	plasma membrane	AT1G07860	At1g07860	Serine/Threonine-kinase RLCKVII protein;(source:Araport11)	not assigned.unknown	plasma membrane	Jones AM (2014)	24833385	protein complementation assay
AT1G23080	PIN7	Encodes a novel component of auxin efflux that is located apically in the basal cell and is involved during embryogenesis in setting up the apical-basal axis in the embryo. It is also involved in pattern specification during root development. In roots, it is expressed at lateral and basal membranes of provascular cells in the meristem and elongation zone, whereas in the columella cells it coincid…	hormone metabolism.auxin.signal transduction	plasma membrane	AT1G16170	At1g16170	ephrin-A3 protein;(source:Araport11)	not assigned.unknown	endoplasmic reticulum	Jones AM (2014)	24833385	protein complementation assay
AT1G23080	PIN7	Encodes a novel component of auxin efflux that is located apically in the basal cell and is involved during embryogenesis in setting up the apical-basal axis in the embryo. It is also involved in pattern specification during root development. In roots, it is expressed at lateral and basal membranes of provascular cells in the meristem and elongation zone, whereas in the columella cells it coincid…	hormone metabolism.auxin.signal transduction	plasma membrane	AT1G34640	At1g34640	peptidase;(source:Araport11)	not assigned.unknown	extracellular	Jones AM (2014)	24833385	protein complementation assay
AT1G23080	PIN7	Encodes a novel component of auxin efflux that is located apically in the basal cell and is involved during embryogenesis in setting up the apical-basal axis in the embryo. It is also involved in pattern specification during root development. In roots, it is expressed at lateral and basal membranes of provascular cells in the meristem and elongation zone, whereas in the columella cells it coincid…	hormone metabolism.auxin.signal transduction	plasma membrane	AT1G47640	At1g47640	seven transmembrane domain protein;(source:Araport11)	not assigned.unknown	plasma membrane	Jones AM (2014)	24833385	protein complementation assay
AT1G23080	PIN7	Encodes a novel component of auxin efflux that is located apically in the basal cell and is involved during embryogenesis in setting up the apical-basal axis in the embryo. It is also involved in pattern specification during root development. In roots, it is expressed at lateral and basal membranes of provascular cells in the meristem and elongation zone, whereas in the columella cells it coincid…	hormone metabolism.auxin.signal transduction	plasma membrane	AT5G49540	At5g49540	Rab5-interacting family protein;(source:Araport11)	not assigned.unknown	plasma membrane	Jones AM (2014)	24833385	protein complementation assay
AT1G23080	PIN7	Encodes a novel component of auxin efflux that is located apically in the basal cell and is involved during embryogenesis in setting up the apical-basal axis in the embryo. It is also involved in pattern specification during root development. In roots, it is expressed at lateral and basal membranes of provascular cells in the meristem and elongation zone, whereas in the columella cells it coincid…	hormone metabolism.auxin.signal transduction	plasma membrane	AT5G11890	EMB3135	harpin-induced protein;(source:Araport11)	not assigned.unknown	plasma membrane	Jones AM (2014)	24833385	protein complementation assay
AT1G23080	PIN7	Encodes a novel component of auxin efflux that is located apically in the basal cell and is involved during embryogenesis in setting up the apical-basal axis in the embryo. It is also involved in pattern specification during root development. In roots, it is expressed at lateral and basal membranes of provascular cells in the meristem and elongation zone, whereas in the columella cells it coincid…	hormone metabolism.auxin.signal transduction	plasma membrane	AT4G30850	HHP2	heptahelical transmembrane protein homologous to human adiponectin receptors and progestin receptors	not assigned.unknown	golgi	Jones AM (2014)	24833385	protein complementation assay
AT1G23080	PIN7	Encodes a novel component of auxin efflux that is located apically in the basal cell and is involved during embryogenesis in setting up the apical-basal axis in the embryo. It is also involved in pattern specification during root development. In roots, it is expressed at lateral and basal membranes of provascular cells in the meristem and elongation zone, whereas in the columella cells it coincid…	hormone metabolism.auxin.signal transduction	plasma membrane	AT4G37680	HHP4	heptahelical transmembrane protein HHP4	not assigned.unknown	plasma membrane,golgi	Jones AM (2014)	24833385	protein complementation assay
AT1G23080	PIN7	Encodes a novel component of auxin efflux that is located apically in the basal cell and is involved during embryogenesis in setting up the apical-basal axis in the embryo. It is also involved in pattern specification during root development. In roots, it is expressed at lateral and basal membranes of provascular cells in the meristem and elongation zone, whereas in the columella cells it coincid…	hormone metabolism.auxin.signal transduction	plasma membrane	AT1G17280	UBC34	ubiquitin-conjugating enzyme 34;(source:Araport11)	protein.degradation.ubiquitin	cytosol,peroxisome	Jones AM (2014)	24833385	protein complementation assay
AT1G23080	PIN7	Encodes a novel component of auxin efflux that is located apically in the basal cell and is involved during embryogenesis in setting up the apical-basal axis in the embryo. It is also involved in pattern specification during root development. In roots, it is expressed at lateral and basal membranes of provascular cells in the meristem and elongation zone, whereas in the columella cells it coincid…	hormone metabolism.auxin.signal transduction	plasma membrane	AT2G26180	IQD6	Transient Expression of Pro35S:YFP-IQD5 in leaves of N. benthamiana alters microtubule organization.	signalling.calcium	nucleus	Jones AM (2014)	24833385	protein complementation assay
AT1G23080	PIN7	Encodes a novel component of auxin efflux that is located apically in the basal cell and is involved during embryogenesis in setting up the apical-basal axis in the embryo. It is also involved in pattern specification during root development. In roots, it is expressed at lateral and basal membranes of provascular cells in the meristem and elongation zone, whereas in the columella cells it coincid…	hormone metabolism.auxin.signal transduction	plasma membrane	AT5G06320	NHL3	encodes a protein whose sequence is similar to tobacco hairpin-induced gene (HIN1) and Arabidopsis non-race specific disease resistance gene (NDR1). Expression of this gene is induced by cucumber mosaic virus, spermine and Pseudomonas syringae pv. tomato DC3000. The gene product is localized to the plasma membrane.	stress.biotic	plasma membrane	Jones AM (2014)	24833385	protein complementation assay
AT1G23080	PIN7	Encodes a novel component of auxin efflux that is located apically in the basal cell and is involved during embryogenesis in setting up the apical-basal axis in the embryo. It is also involved in pattern specification during root development. In roots, it is expressed at lateral and basal membranes of provascular cells in the meristem and elongation zone, whereas in the columella cells it coincid…	hormone metabolism.auxin.signal transduction	plasma membrane	AT5G50520	At5g50520	Major facilitator superfamily protein;(source:Araport11)	#N/A	plasma membrane	Jones AM (2014)	24833385	protein complementation assay
AT1G23080	PIN7	Encodes a novel component of auxin efflux that is located apically in the basal cell and is involved during embryogenesis in setting up the apical-basal axis in the embryo. It is also involved in pattern specification during root development. In roots, it is expressed at lateral and basal membranes of provascular cells in the meristem and elongation zone, whereas in the columella cells it coincid…	hormone metabolism.auxin.signal transduction	plasma membrane	AT3G66654	At3g66654	Cyclophilin-like peptidyl-prolyl cis-trans isomerase family protein;(source:Araport11)	#N/A	golgi	Jones AM (2014)	24833385	protein complementation assay
AT1G23080	PIN7	Encodes a novel component of auxin efflux that is located apically in the basal cell and is involved during embryogenesis in setting up the apical-basal axis in the embryo. It is also involved in pattern specification during root development. In roots, it is expressed at lateral and basal membranes of provascular cells in the meristem and elongation zone, whereas in the columella cells it coincid…	hormone metabolism.auxin.signal transduction	plasma membrane	AT4G14455	AtBET12	Encodes a Bet1/Sft1-like SNARE protein, which can only partially suppresses the temperature-sensitive growth defect in sft1-1 yeast cells; however, it cannot support the deletion of the yeast BET1 gene (bet1Δ). In yeast, Bet1p is the v-SNARE (soluble N-ethylmaleimide-sensitive factor adaptor protein receptor, V-type) involved in trafficking between the ER and Golgi.	#N/A	golgi	Jones AM (2014)	24833385	protein complementation assay
AT1G73590	PIN1	Encodes an auxin efflux carrier involved in shoot and root development. It is involved in the maintenance of embryonic auxin gradients. Loss of function severely affects organ initiation, pin1 mutants are characterised by an inflorescence meristem that does not initiate any flowers, resulting in the formation of a naked inflorescence stem. PIN1 is involved in the determination of leaf shape by ac…	hormone metabolism.auxin.signal transduction	plasma membrane	AT2G39840	TOPP4	Encodes the catalytic subunit of a Type 1 phosphoprotein Ser/Thr phosphatase, expressed in roots, shoots and flowers. The mRNA is cell-to-cell mobile.	protein.postranslational modification	cytosol	Guo X (2015)	25560878	enzymatic study
AT1G73590	PIN1	Encodes an auxin efflux carrier involved in shoot and root development. It is involved in the maintenance of embryonic auxin gradients. Loss of function severely affects organ initiation, pin1 mutants are characterised by an inflorescence meristem that does not initiate any flowers, resulting in the formation of a naked inflorescence stem. PIN1 is involved in the determination of leaf shape by ac…	hormone metabolism.auxin.signal transduction	plasma membrane	AT5G63980	ALX8	Encodes a bifunctional protein that has 3'(2'),5'-bisphosphate nucleotidase and inositol polyphosphate 1-phosphatase activities and rescues sulfur assimilation mutants in yeast. It is involved in the response to cold, drought (negative regulator of drought tolerance), and ABA. Mutants in this gene exhibit enhanced induction of stress genes in response to cold, ABA, salt and dehydration due to hig…	nucleotide metabolism.degradation	plastid	Dai M (2012)	22715043	protein complementation assay
AT1G73590	PIN1	Encodes an auxin efflux carrier involved in shoot and root development. It is involved in the maintenance of embryonic auxin gradients. Loss of function severely affects organ initiation, pin1 mutants are characterised by an inflorescence meristem that does not initiate any flowers, resulting in the formation of a naked inflorescence stem. PIN1 is involved in the determination of leaf shape by ac…	hormone metabolism.auxin.signal transduction	plasma membrane	AT1G50370	AtFYPP1	Calcineurin-like metallo-phosphoesterase superfamily protein;(source:Araport11)	protein.postranslational modification	cytosol	Dai M (2012)	22715043	protein complementation assay
AT1G73590	PIN1	Encodes an auxin efflux carrier involved in shoot and root development. It is involved in the maintenance of embryonic auxin gradients. Loss of function severely affects organ initiation, pin1 mutants are characterised by an inflorescence meristem that does not initiate any flowers, resulting in the formation of a naked inflorescence stem. PIN1 is involved in the determination of leaf shape by ac…	hormone metabolism.auxin.signal transduction	plasma membrane	AT3G19980	AtFYPP3	Encodes catalytic subunit of serine/threonine protein phosphatase 2A. It can associate with phytochromes A and B in vitro. Mutant plants display an accelerated flowering phenotype.	protein.postranslational modification	cytosol	Dai M (2012)	22715043	protein complementation assay
AT1G73590	PIN1	Encodes an auxin efflux carrier involved in shoot and root development. It is involved in the maintenance of embryonic auxin gradients. Loss of function severely affects organ initiation, pin1 mutants are characterised by an inflorescence meristem that does not initiate any flowers, resulting in the formation of a naked inflorescence stem. PIN1 is involved in the determination of leaf shape by ac…	hormone metabolism.auxin.signal transduction	plasma membrane	AT1G25490	RCN1	One of three genes encoding phosphoprotein phosphatase 2A regulatory subunit A; Recessive ethylene-response mutant EER1 displays increased ethylene sensitivity in the hypocotyl and stem	protein.postranslational modification	plasma membrane	Dai M (2012)	22715043	protein complementation assay
AT5G57090	PIN2	Encodes an auxin efflux carrier that is similar to bacterial membrane transporters. Root-specific role in the transport of auxin. Acts downstream of CTR1 and ethylene biosynthesis, in the same pathway as EIN2 and AUX1, and independent from EIN3 and EIN5/AIN1 pathway. In the root, the protein localizes apically in epidermal and lateral root cap cells and predominantly basally in cortical cells. Fu…	hormone metabolism.auxin.signal transduction	plasma membrane	AT5G63980	ALX8	Encodes a bifunctional protein that has 3'(2'),5'-bisphosphate nucleotidase and inositol polyphosphate 1-phosphatase activities and rescues sulfur assimilation mutants in yeast. It is involved in the response to cold, drought (negative regulator of drought tolerance), and ABA. Mutants in this gene exhibit enhanced induction of stress genes in response to cold, ABA, salt and dehydration due to hig…	nucleotide metabolism.degradation	plastid	Dai M (2012)	22715043	affinity chromatography technology
AT5G57090	PIN2	Encodes an auxin efflux carrier that is similar to bacterial membrane transporters. Root-specific role in the transport of auxin. Acts downstream of CTR1 and ethylene biosynthesis, in the same pathway as EIN2 and AUX1, and independent from EIN3 and EIN5/AIN1 pathway. In the root, the protein localizes apically in epidermal and lateral root cap cells and predominantly basally in cortical cells. Fu…	hormone metabolism.auxin.signal transduction	plasma membrane	AT1G50370	AtFYPP1	Calcineurin-like metallo-phosphoesterase superfamily protein;(source:Araport11)	protein.postranslational modification	cytosol	Dai M (2012)	22715043	affinity chromatography technology
AT5G57090	PIN2	Encodes an auxin efflux carrier that is similar to bacterial membrane transporters. Root-specific role in the transport of auxin. Acts downstream of CTR1 and ethylene biosynthesis, in the same pathway as EIN2 and AUX1, and independent from EIN3 and EIN5/AIN1 pathway. In the root, the protein localizes apically in epidermal and lateral root cap cells and predominantly basally in cortical cells. Fu…	hormone metabolism.auxin.signal transduction	plasma membrane	AT3G19980	AtFYPP3	Encodes catalytic subunit of serine/threonine protein phosphatase 2A. It can associate with phytochromes A and B in vitro. Mutant plants display an accelerated flowering phenotype.	protein.postranslational modification	cytosol	Dai M (2012)	22715043	protein complementation assay
AT5G57090	PIN2	Encodes an auxin efflux carrier that is similar to bacterial membrane transporters. Root-specific role in the transport of auxin. Acts downstream of CTR1 and ethylene biosynthesis, in the same pathway as EIN2 and AUX1, and independent from EIN3 and EIN5/AIN1 pathway. In the root, the protein localizes apically in epidermal and lateral root cap cells and predominantly basally in cortical cells. Fu…	hormone metabolism.auxin.signal transduction	plasma membrane	AT1G25490	RCN1	One of three genes encoding phosphoprotein phosphatase 2A regulatory subunit A; Recessive ethylene-response mutant EER1 displays increased ethylene sensitivity in the hypocotyl and stem	protein.postranslational modification	plasma membrane	Dai M (2012)	22715043	affinity chromatography technology
AT1G70940	PIN3	A regulator of auxin efflux and involved in differential growth. PIN3 is expressed in gravity-sensing tissues, with PIN3 protein accumulating predominantly at the lateral cell surface. PIN3 localizes to the plasma membrane and to vesicles. In roots, PIN3 is expressed without pronounced polarity in tiers two and three of the columella cells, at the basal side of vascular cells, and to the lateral …	hormone metabolism.auxin.signal transduction	plasma membrane	AT5G63980	ALX8	Encodes a bifunctional protein that has 3'(2'),5'-bisphosphate nucleotidase and inositol polyphosphate 1-phosphatase activities and rescues sulfur assimilation mutants in yeast. It is involved in the response to cold, drought (negative regulator of drought tolerance), and ABA. Mutants in this gene exhibit enhanced induction of stress genes in response to cold, ABA, salt and dehydration due to hig…	nucleotide metabolism.degradation	plastid	Dai M (2012)	22715043	protein complementation assay
AT1G70940	PIN3	A regulator of auxin efflux and involved in differential growth. PIN3 is expressed in gravity-sensing tissues, with PIN3 protein accumulating predominantly at the lateral cell surface. PIN3 localizes to the plasma membrane and to vesicles. In roots, PIN3 is expressed without pronounced polarity in tiers two and three of the columella cells, at the basal side of vascular cells, and to the lateral …	hormone metabolism.auxin.signal transduction	plasma membrane	AT1G50370	AtFYPP1	Calcineurin-like metallo-phosphoesterase superfamily protein;(source:Araport11)	protein.postranslational modification	cytosol	Dai M (2012)	22715043	protein complementation assay
AT1G70940	PIN3	A regulator of auxin efflux and involved in differential growth. PIN3 is expressed in gravity-sensing tissues, with PIN3 protein accumulating predominantly at the lateral cell surface. PIN3 localizes to the plasma membrane and to vesicles. In roots, PIN3 is expressed without pronounced polarity in tiers two and three of the columella cells, at the basal side of vascular cells, and to the lateral …	hormone metabolism.auxin.signal transduction	plasma membrane	AT3G19980	AtFYPP3	Encodes catalytic subunit of serine/threonine protein phosphatase 2A. It can associate with phytochromes A and B in vitro. Mutant plants display an accelerated flowering phenotype.	protein.postranslational modification	cytosol	Dai M (2012)	22715043	protein complementation assay
AT1G70940	PIN3	A regulator of auxin efflux and involved in differential growth. PIN3 is expressed in gravity-sensing tissues, with PIN3 protein accumulating predominantly at the lateral cell surface. PIN3 localizes to the plasma membrane and to vesicles. In roots, PIN3 is expressed without pronounced polarity in tiers two and three of the columella cells, at the basal side of vascular cells, and to the lateral …	hormone metabolism.auxin.signal transduction	plasma membrane	AT1G25490	RCN1	One of three genes encoding phosphoprotein phosphatase 2A regulatory subunit A; Recessive ethylene-response mutant EER1 displays increased ethylene sensitivity in the hypocotyl and stem	protein.postranslational modification	plasma membrane	Dai M (2012)	22715043	protein complementation assay
AT2G01420	PIN4	Encodes a putative auxin efflux carrier that is localized in developing and mature root meristems. It is involved in the maintenance of embryonic auxin gradients. A role for AtPIN4 in generating a sink for auxin below the quiescent center of the root meristem that is essential for auxin distribution and patterning is proposed. In the root, PIN4 is detected around the quiescent center and cells su…	hormone metabolism.auxin.signal transduction	plasma membrane	AT1G50370	AtFYPP1	Calcineurin-like metallo-phosphoesterase superfamily protein;(source:Araport11)	protein.postranslational modification	cytosol	Dai M (2012)	22715043	protein complementation assay
AT2G01420	PIN4	Encodes a putative auxin efflux carrier that is localized in developing and mature root meristems. It is involved in the maintenance of embryonic auxin gradients. A role for AtPIN4 in generating a sink for auxin below the quiescent center of the root meristem that is essential for auxin distribution and patterning is proposed. In the root, PIN4 is detected around the quiescent center and cells su…	hormone metabolism.auxin.signal transduction	plasma membrane	AT3G19980	AtFYPP3	Encodes catalytic subunit of serine/threonine protein phosphatase 2A. It can associate with phytochromes A and B in vitro. Mutant plants display an accelerated flowering phenotype.	protein.postranslational modification	cytosol	Dai M (2012)	22715043	protein complementation assay
AT1G70940	PIN3	A regulator of auxin efflux and involved in differential growth. PIN3 is expressed in gravity-sensing tissues, with PIN3 protein accumulating predominantly at the lateral cell surface. PIN3 localizes to the plasma membrane and to vesicles. In roots, PIN3 is expressed without pronounced polarity in tiers two and three of the columella cells, at the basal side of vascular cells, and to the lateral …	hormone metabolism.auxin.signal transduction	plasma membrane	AT5G16150	GLT1	Encodes a putative plastidic glucose transporter.	major CHO metabolism.degradation.starch.transporter	plastid	Chen J (2012)	22737156	protein complementation assay
AT1G70940	PIN3	A regulator of auxin efflux and involved in differential growth. PIN3 is expressed in gravity-sensing tissues, with PIN3 protein accumulating predominantly at the lateral cell surface. PIN3 localizes to the plasma membrane and to vesicles. In roots, PIN3 is expressed without pronounced polarity in tiers two and three of the columella cells, at the basal side of vascular cells, and to the lateral …	hormone metabolism.auxin.signal transduction	plasma membrane	AT1G53270	ABCG10	ABC-2 type transporter family protein;(source:Araport11)	transport.ABC transporters and multidrug resistance systems	plasma membrane	Chen J (2012)	22737156	protein complementation assay
AT1G70940	PIN3	A regulator of auxin efflux and involved in differential growth. PIN3 is expressed in gravity-sensing tissues, with PIN3 protein accumulating predominantly at the lateral cell surface. PIN3 localizes to the plasma membrane and to vesicles. In roots, PIN3 is expressed without pronounced polarity in tiers two and three of the columella cells, at the basal side of vascular cells, and to the lateral …	hormone metabolism.auxin.signal transduction	plasma membrane	AT5G15240	At5g15240	Transmembrane amino acid transporter family protein;(source:Araport11)	transport.amino acids	vacuole	Chen J (2012)	22737156	protein complementation assay
AT2G01420	PIN4	Encodes a putative auxin efflux carrier that is localized in developing and mature root meristems. It is involved in the maintenance of embryonic auxin gradients. A role for AtPIN4 in generating a sink for auxin below the quiescent center of the root meristem that is essential for auxin distribution and patterning is proposed. In the root, PIN4 is detected around the quiescent center and cells su…	hormone metabolism.auxin.signal transduction	plasma membrane	AT2G41190	At2g41190	Transmembrane amino acid transporter family protein;(source:Araport11)	transport.amino acids	vacuole	Chen J (2012)	22737156	protein complementation assay
AT2G01420	PIN4	Encodes a putative auxin efflux carrier that is localized in developing and mature root meristems. It is involved in the maintenance of embryonic auxin gradients. A role for AtPIN4 in generating a sink for auxin below the quiescent center of the root meristem that is essential for auxin distribution and patterning is proposed. In the root, PIN4 is detected around the quiescent center and cells su…	hormone metabolism.auxin.signal transduction	plasma membrane	AT3G06100	NIP7;1	Encodes NIP7;1, an anther-specific boric acid transporter of the aquaporin superfamily regulated by an unusual tyrosine in helix 2 of the transport pore.	transport.Major Intrinsic Proteins.NIP	plasma membrane	Chen J (2012)	22737156	protein complementation assay
AT2G01420	PIN4	Encodes a putative auxin efflux carrier that is localized in developing and mature root meristems. It is involved in the maintenance of embryonic auxin gradients. A role for AtPIN4 in generating a sink for auxin below the quiescent center of the root meristem that is essential for auxin distribution and patterning is proposed. In the root, PIN4 is detected around the quiescent center and cells su…	hormone metabolism.auxin.signal transduction	plasma membrane	AT5G49890	AtCLC-C	member of Anion channel protein family	transport.unspecified anions	vacuole	Chen J (2012)	22737156	protein complementation assay
AT1G73590	PIN1	Encodes an auxin efflux carrier involved in shoot and root development. It is involved in the maintenance of embryonic auxin gradients. Loss of function severely affects organ initiation, pin1 mutants are characterised by an inflorescence meristem that does not initiate any flowers, resulting in the formation of a naked inflorescence stem. PIN1 is involved in the determination of leaf shape by ac…	hormone metabolism.auxin.signal transduction	plasma membrane	AT2G36910	ABCB1	Belongs to the family of ATP-binding cassette (ABC) transporters. Also known as AtMDR1.Possibly regulates auxin-dependent responses by influencing basipetal auxin transport in the root. Exerts nonredundant, partially overlapping functions with the ABC transporter encoded by AT3G28860. PGP1 mediates cellular efflux of IAA and interacts with PIN genes that may confer an accelerated vectoral compone…	transport.ABC transporters and multidrug resistance systems	plasma membrane	Blakeslee JJ (2007)	17237354	affinity chromatography technology
AT1G73590	PIN1	Encodes an auxin efflux carrier involved in shoot and root development. It is involved in the maintenance of embryonic auxin gradients. Loss of function severely affects organ initiation, pin1 mutants are characterised by an inflorescence meristem that does not initiate any flowers, resulting in the formation of a naked inflorescence stem. PIN1 is involved in the determination of leaf shape by ac…	hormone metabolism.auxin.signal transduction	plasma membrane	AT3G28860	ABCB19	Encodes a member of the ATP-binding cassette (ABC) transporter family that is involved in auxin transport and is involved in postembryonic organ separation. Also known as AtMDR11 and PGP19. Possibly regulates auxin-dependent responses by influencing basipetal auxin transport in the root. Acts upstream of phyA in regulating hypocotyl elongation and gravitropic response. Exerts nonredundant, partia…	transport.ABC transporters and multidrug resistance systems	plasma membrane	Blakeslee JJ (2007)	17237354	two hybrid
AT5G57090	PIN2	Encodes an auxin efflux carrier that is similar to bacterial membrane transporters. Root-specific role in the transport of auxin. Acts downstream of CTR1 and ethylene biosynthesis, in the same pathway as EIN2 and AUX1, and independent from EIN3 and EIN5/AIN1 pathway. In the root, the protein localizes apically in epidermal and lateral root cap cells and predominantly basally in cortical cells. Fu…	hormone metabolism.auxin.signal transduction	plasma membrane	AT3G28860	ABCB19	Encodes a member of the ATP-binding cassette (ABC) transporter family that is involved in auxin transport and is involved in postembryonic organ separation. Also known as AtMDR11 and PGP19. Possibly regulates auxin-dependent responses by influencing basipetal auxin transport in the root. Acts upstream of phyA in regulating hypocotyl elongation and gravitropic response. Exerts nonredundant, partia…	transport.ABC transporters and multidrug resistance systems	plasma membrane	Blakeslee JJ (2007)	17237354	two hybrid
